1 **The role of metal binding in the function of the human salivary antimicrobial peptide histatin-5**

2

3 Louisa Stewart<sup>1§</sup>, YoungJin Hong<sup>1§</sup>, Isabel Holmes<sup>1</sup>, Samantha Firth<sup>1</sup>, Jack Bolton<sup>1</sup>, Yazmin Santos<sup>2</sup>,  
4 Steven Cobb<sup>2</sup>, Nicholas Jakubovics<sup>3</sup>, Karrera Djoko<sup>1\*</sup>

5

6 <sup>§</sup>These authors contributed equally to the experimental work. LS is listed first to acknowledge greater  
7 involvement in manuscript preparation and editing.

8

9 <sup>1</sup>Department of Biosciences, Durham University, Durham DH1 3LE, United Kingdom

10 <sup>2</sup>Department of Chemistry, Durham University, Durham DH1 3LE, United Kingdom

11 <sup>3</sup>School of Dental Sciences, Newcastle University, Newcastle, United Kingdom.

12

13 \*Corresponding author

14 karrera.djoko@durham.ac.uk

15

16 **Keywords:** antimicrobial peptide, histatin, copper, nutritional immunity, Streptococcus

17 **ABSTRACT**

18

19 Antimicrobial peptides (AMPs) are key components of diverse host innate immune systems.  
20 The family of human salivary AMPs known as histatins bind Zn and Cu. Fluctuations in Zn and Cu  
21 availability play significant roles in the host innate immune response (so-called “nutritional immunity”).  
22 Thus, we hypothesised that histatins contribute to nutritional immunity by influencing host Zn and/or  
23 Cu availability. We posited that histatins limit Zn availability (promote bacterial Zn starvation) and/or  
24 raise Cu availability (promote bacterial Cu poisoning). To test this hypothesis, we examined the  
25 interactions between histatin-5 (Hst5) and Group A *Streptococcus* (GAS), which colonises the human  
26 oropharynx. Our results showed that Hst5 does not strongly influence Zn availability. Hst5 did not  
27 induce expression of Zn-responsive genes in GAS, nor did it suppress growth of mutant strains that  
28 are impaired in Zn transport. Biochemical examination of purified peptides confirmed that Hst5 binds  
29 Zn only weakly. By contrast, Hst5 bound Cu tightly and it strongly influenced Cu availability. However,  
30 Hst5 did not promote Cu toxicity. Instead, Hst5 suppressed expression of Cu-inducible genes,  
31 stopped intracellular accumulation of Cu, and rescued growth of a  $\Delta copA$  mutant strain that is  
32 impaired in Cu efflux. We thus proposed a new role for salivary histatins as major Cu buffers in saliva  
33 that contribute to microbial homeostasis in the oral cavity and oropharynx by reducing the potential  
34 negative effects of Cu exposure (e.g. from food) to microbes. Our results raise broad questions  
35 regarding the physiological roles of diverse metal-binding AMPs and the management of host metal  
36 availability during host-microbe interactions.

## 37 INTRODUCTION

38

39 Antimicrobial peptides (AMPs) are short, often cationic peptides that are secreted by diverse  
40 organisms from across the domains of life<sup>1</sup>. These peptides usually act as immune effectors that kill  
41 invading microbes as part of the host innate immune system, but many also play key functions in the  
42 normal biology of the host organism. A sub-family of AMPs binds metals. These metallo-AMPs often  
43 synergise with metal ions or become activated upon metal binding<sup>2-4</sup>.

44 Salivary histatins comprise a family of His-rich, metallo-AMPs that are all derived from two  
45 parent peptides, namely Histatin-1 and Histatin-3<sup>5,6</sup>. Both histatins are expressed constitutively by the  
46 salivary glands of humans and some higher primates<sup>6,7</sup>. Upon secretion into the oral cavity, histatins  
47 are rapidly processed into shorter fragments<sup>8,9</sup> by unidentified human salivary proteases or proteases  
48 from resident oral microbes. Of these fragments, Histatin-5 (Hst5; Table 1) is the best characterised.

49

50

**Table 1.** Hst5 peptides and variants used in this work.

| Peptide    | Sequence                                                                               |    |    |
|------------|----------------------------------------------------------------------------------------|----|----|
|            | 1                                                                                      | 11 | 21 |
| Hst5       | DS <u>H</u> AKR <u>H</u> H <u>G</u> Y KRKF <u>H</u> EK <u>H</u> H <u>S</u> HRGY        |    |    |
| ΔH3        | AS <u>A</u> AKR <u>H</u> H <u>G</u> Y KRKF <u>H</u> EK <u>H</u> H <u>S</u> HRGY        |    |    |
| ΔH3,7      | DS <u>A</u> AKR <u>A</u> H <u>G</u> Y KRKF <u>H</u> EK <u>H</u> H <u>S</u> HRGY        |    |    |
| ΔH7,8      | DS <u>H</u> AKR <u>A</u> <u>A</u> <u>G</u> Y KRKF <u>H</u> EK <u>H</u> H <u>S</u> HRGY |    |    |
| ΔH15,18,19 | DS <u>H</u> AKR <u>H</u> H <u>G</u> Y KRKF <u>A</u> EK <u>A</u> <u>A</u> S HRGY        |    |    |

51

52 Hst5 is noted for its direct antimicrobial activity against the fungus *Candida albicans*<sup>10,11</sup>.  
53 Unlike other AMPs, Hst5 does not appear to permeabilise fungal membranes, although it does  
54 destabilise some bacterial membranes<sup>11</sup>. Beyond its direct action on membranes, the antimicrobial  
55 activity of Hst5 requires the peptide to be internalised into the cytoplasm, usually *via* energy-  
56 dependent pathways for peptide uptake<sup>11,12</sup>. Once in the cytoplasm, Hst5 encounters its targets and  
57 causes toxicity *via* multiple pathways that are not fully elucidated<sup>10,13</sup>.

58 Hst5 contains the characteristic Zn-binding motif His-Glu-x-His-His (Table 1), but whether Zn  
59 binding is essential for the antimicrobial activity of this AMP is unclear. Hst5 derivatives that lack one  
60 or all three His residues remain active against *C. albicans*<sup>14</sup>. Conflicting reports show that addition of  
61 Zn can both enhance<sup>15</sup> and suppress<sup>16</sup> Hst5 activity against this fungus. The reason for this  
62 discrepancy has not been identified. In addition, Hst5 possesses three Cu-binding motifs, namely the  
63 N-terminal ATCUN motif that binds Cu(II) and two *bis*-His motifs that bind one Cu(I) each (Table 1)<sup>17</sup>.  
64 Addition of Cu potentiates the activity of Hst5 against *C. albicans*<sup>17</sup>. This potentiation relies on the  
65 Cu(I) site but not the Cu(II) site<sup>17</sup>.

66 Beyond histatins and metallo-AMPs, metal-dependent host innate immune responses are well  
67 described. In response to microbial infection, metal levels and those of metal-binding or metal-  
68 transport proteins within a host organism can rise and fall, leading to fluctuations in metal availability  
69 within different niches in the infected host. Increases in metal availability promote microbial poisoning

70 while decreases in metal availability promote microbial starvation. These antagonistic host responses  
71 are known as “nutritional immunity”<sup>18</sup>. Do histatins and other metallo-AMPs contribute to these metal-  
72 dependent immune responses and, if so, how?

73 This study explored the relationship between Hst5 and metals, particularly Zn and Cu, and  
74 examined the role of this AMP in influencing metal availability during nutritional immunity. Based on  
75 the reported metal-dependent effects of Hst5 against *C. albicans* and on established features of  
76 nutritional immunity, we hypothesised that Hst5 either limits Zn availability (and promotes microbial Zn  
77 starvation) and/or raises Cu availability (and promotes Cu poisoning).

78 To test our hypothesis, the Gram-positive bacterium *Streptococcus pyogenes* (Group A  
79 *Streptococcus*, GAS) was used as a model. GAS colonises the human oropharynx, where it comes  
80 into contact with saliva and salivary components, but its interactions with Hst5 have not been  
81 described previously. Moreover, pathways for metal homeostasis in GAS are relatively well  
82 understood and phenotypes of mutant strains lacking key metal transport proteins are known<sup>19</sup>. These  
83 features enabled GAS to be exploited here as a tractable, well-defined experimental tool for  
84 examining the metal-dependent effects of Hst5.

85

## 86 RESULTS

87

### 88 Hst5 does not exert direct antibacterial effects against GAS or other oral streptococci.

89 The effects of Hst5 on growth of GAS were examined in a metal-deplete, chemically defined  
90 medium (CDM)<sup>20</sup>. In this medium, up to 50  $\mu$ M Hst5 (ca. total histatin concentrations in fresh salivary  
91 secretions<sup>9</sup>) did not affect growth of wild-type GAS (Figure 1A). Identical results were obtained in THY  
92 medium (Figure S1A).

93 The effects of Hst5 on GAS survival were examined in 10 mM phosphate buffer<sup>11,15</sup>. Under  
94 these conditions, up to 50  $\mu$ M Hst5 did not kill GAS (Figure 1B). Instead, Hst5 prolonged survival of  
95 this bacterium (Figure 1B). A parallel control experiment showed that the same concentrations of Hst5  
96 killed *Pseudomonas aeruginosa* within minutes<sup>11</sup> (Figure S2A), confirming that our peptide stocks  
97 were active.

98

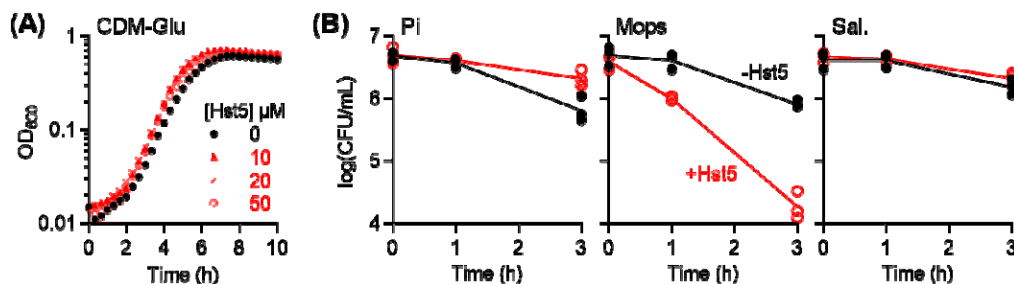

99

100 **Figure 1. Effects of Hst5 on (A) growth and (B) survival of GAS.** (A) Bacteria ( $N = 2$ ) were  
101 cultured in CDM in the presence of Hst5 (0–50  $\mu$ M). (B) Bacteria ( $N = 3$ ) were incubated in phosphate  
102 buffer (10 mM, pH 7.4; Pi), Na-Mops buffer (10 mM, pH 7.4; Mops), or artificial saliva salts (pH 7.2-  
103 7.4; Sal., see Dataset S1a for composition), with ( $\circ$ ) or without ( $\bullet$ ) Hst5 (50  $\mu$ M).

104 Like other cationic AMPs, the antimicrobial activity of Hst5 relies on initial electrostatic binding  
105 of the peptide to microbial surface proteins or membranes<sup>11,21</sup>. Such interactions are suppressed by  
106 salts and high ionic strength buffers<sup>11,14,22-26</sup>. To lower the ionic strength in our experiments,  
107 phosphate was replaced with Mops. Under these new conditions, Hst5 *did* kill GAS (Figure 1B).  
108 However, carryover salts from solutions used in preparing the inoculum abolished this killing effect  
109 (Figure S2B), underscoring the sensitivity of these assays to salt.

110 To better reflect the physiological context in which Hst5 plays a role, we repeated the kill  
111 assay in buffered “artificial saliva salts”, whose salt composition approximates healthy saliva (Dataset  
112 S1a). Hst5 did *not* kill GAS under these conditions (Figure 1B), confirming that the results in  
113 phosphate buffer are more physiologically relevant. For ease of comparison with existing literature,  
114 further experiments described below used phosphate buffer.

115 The lack of a direct antibacterial effect against GAS adds to the list of contradictory effects of  
116 Hst5 against streptococci reported in the literature<sup>27-32</sup>. Given the sensitivity of these assays to the  
117 specific experimental conditions, the effects of Hst5 on GAS and five oral streptococci, namely *S.*  
118 *anginosus*, *S. mutans*, *S. oralis*, *S. salivarius*, and *S. sanguinis*, were examined here in parallel. Hst5  
119 did *not* kill or inhibit growth of any of the streptococci under these conditions (Figure 2, Figure S1B). In  
120 fact, Hst5 promoted growth of *S. anginosus*, *S. oralis*, and, to a lesser extent, *S. sanguinis*. The  
121 mechanism behind this growth-promoting activity of Hst5 is beyond the scope of the present work, but  
122 is presumably related to the metal-chelating ability of this AMP (described below).

123

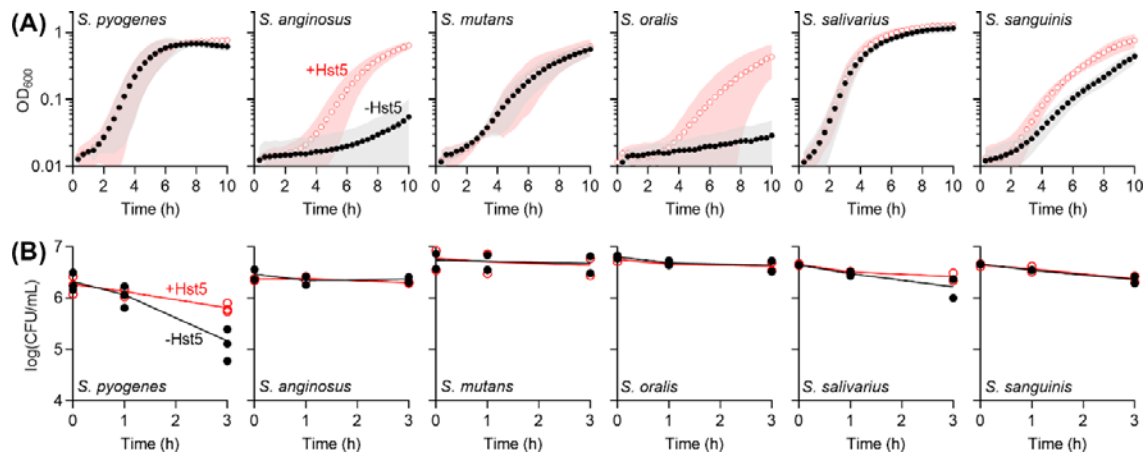

124

125 **Figure 2. Effects of Hst5 on (A) growth and (B) survival of oral streptococci.** Bacteria ( $N = 2$ )  
126 were cultured in CDM (A) or incubated in phosphate buffer (B), with (○) or without (●) Hst5 (50  $\mu$ M).

127 **Hst5 does not strongly influence Zn availability.**

128 To determine whether Hst5 contributes to nutritional immunity, the effects of this AMP on  
129 GAS were re-examined in the presence of up to 50  $\mu\text{M}$  Zn (equimolar with Hst5 and in excess of Zn  
130 concentrations in whole saliva<sup>33</sup>). Zn neither suppressed nor enhanced the direct effects of Hst5 on  
131 GAS (Figure 3, Figure S1C), suggesting that Hst5 promotes neither Zn starvation nor poisoning,  
132 respectively.  
133

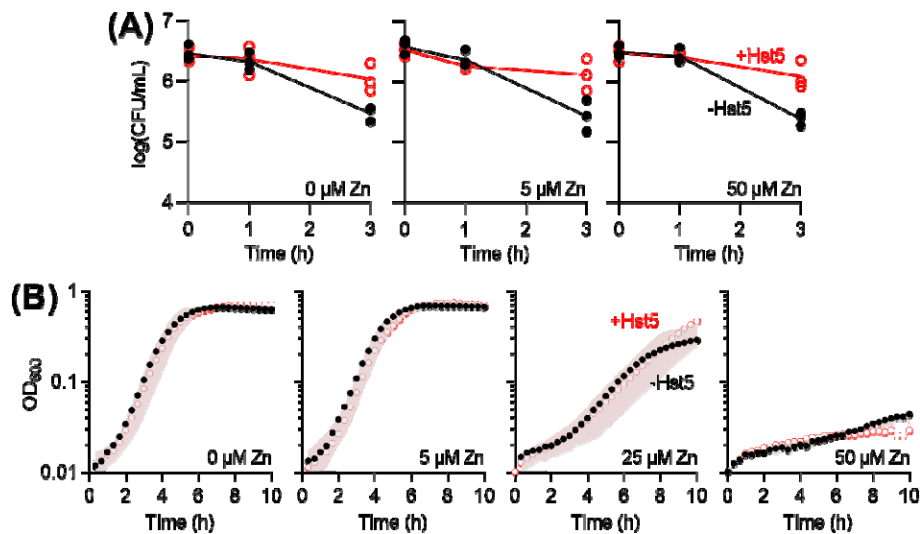

134  
135 **Figure 3. Effects of Zn on (A) survival and (B) growth of GAS in the presence of Hst5.** Bacteria  
136 ( $N = 3$ ) were incubated in phosphate buffer (A) or cultured in CDM (B), in the presence of Zn (0–50  
137  $\mu\text{M}$ ), with (○) or without (●) Hst5 (50  $\mu\text{M}$ ).  
138

139 Zn starvation or poisoning may not strongly affect wild-type GAS since the transcriptionally-  
140 responsive system for Zn homeostasis responds to, and thus counters, such perturbations in Zn  
141 availability (Figure 4). This transcriptional response, *i.e.* expression of the three Zn-responsive genes  
142 *adcA1*, *adcAII*, and *czcD* (Figure 4), was examined here. Only bacteria grown in CDM were used for  
143 analyses, since poor RNA yields were obtained from bacteria that were incubated in phosphate  
144 buffer, likely associated with the progressive loss of viability under these conditions (*cf.* Figure 1B).

145 In the control experiment, adding Zn alone did not further repress transcription of *adcA1* and  
146 *adcAII*, but it did induce expression of *czcD* (Figure S3A), consistent with an increase in Zn  
147 availability. Conversely, adding the Zn chelator TPEN did not affect transcription of *czcD*, but it did  
148 induce expression of *adcA1* and *adcAII*, consistent with a decrease in Zn availability (Figure S3B). By  
149 contrast, adding Hst5 alone perturbed neither the basal expression of *adcA1* or *adcAII* (Figure 5A), nor  
150 the Zn-dependent expression of *czcD* (Figure 5B).

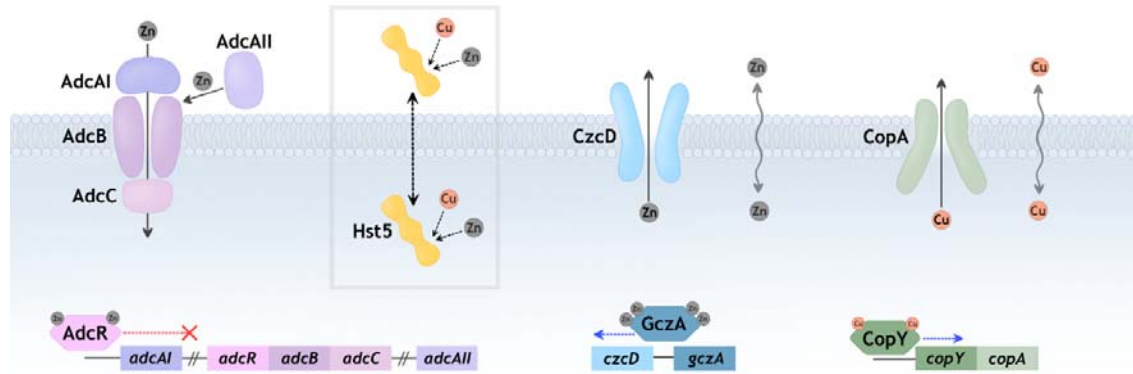

151  
 152 **Figure 4. Metal homeostasis in GAS and hypothesised actions of Hst5. Zn uptake:** AdcAI and  
 153 AdcAll capture extracellular Zn and transfer this metal to AdcBC for import into the cytoplasm. These  
 154 proteins are transcriptionally upregulated by AdcR in response to decreases in Zn availability<sup>34</sup>. **Zn**  
 155 **efflux:** CzcD exports excess Zn out of the cytoplasm. It is transcriptionally upregulated by GcZA in  
 156 response to increases in Zn availability<sup>35</sup>. **Cu efflux:** CopA exports excess Cu out of the cytoplasm. It  
 157 is transcriptionally upregulated by CopY in response to increases in Cu availability<sup>36</sup>. **Hypothesised**  
 158 **actions of Hst5:** Hst5 may remain extracellular, bind Zn or Cu, and suppress extracellular metal  
 159 availability. Alternatively, Hst5 may become internalised and suppress intracellular metal availability.  
 160 Hst5 may also become internalised as the Zn-Hst5 or Cu-Hst5 complex, facilitate entry of Zn or Cu  
 161 into the cytoplasm, and increase metal availability.

162

163 As described earlier, Zn uptake by AdcAI and Zn efflux by CzcD may mask the effects of Hst5  
 164 on Zn availability (Figure 4). Thus, the effects of Hst5 were examined further using the  $\Delta$ *adcAI* and  
 165  $\Delta$ *czcD* mutant strains. Although additional Zn-binding lipoproteins such as AdcAll contribute to Zn  
 166 acquisition<sup>37</sup>, AdcAI is thought to act as the primary Zn importer<sup>37,38</sup>. Therefore, only the  $\Delta$ *adcAI*  
 167 mutant was employed here. The control experiment confirmed that the  $\Delta$ *adcAI* and  $\Delta$ *czcD* mutant  
 168 strains were sensitive to growth inhibition by TPEN<sup>37,38</sup> and added Zn<sup>35,38</sup>, respectively (Figure S4).

169 The  $\Delta$ *adcAI* mutant strain displayed wild-type growth and survival phenotypes in the presence  
 170 of Hst5 (Figures 5B–C), strengthening the proposal that Hst5 does not starve GAS of nutrient Zn.

171 Likewise, the  $\Delta$ *czcD* mutant strain displayed wild-type survival phenotype (Figure 5E).  
 172 Interestingly, Hst5 weakly improved (instead of further inhibited) growth of the  $\Delta$ *czcD* mutant in the  
 173 presence of 10  $\mu$ M of added Zn (Figure 5F). This growth-promoting effect became apparent only upon  
 174 comparing final culture densities (Figure 5G), since exponential growth rates remained unchanged  
 175 (Figure 5H). It appeared to require the predicted Zn-binding ligands His15, His18, and His19<sup>39,40</sup>,  
 176 since growth of the Zn-treated  $\Delta$ *czcD* mutant in the presence of the  $\Delta$ H15,18,19 variant of Hst5 was  
 177 indistinguishable with growth in the absence of Hst5 (Figure S5A-B). The roles of the other His  
 178 residues were less clear (Figure S5A-B). Nevertheless, it can be concluded that Hst5 suppresses  
 179 (instead of potentiates) Zn toxicity to GAS.

180

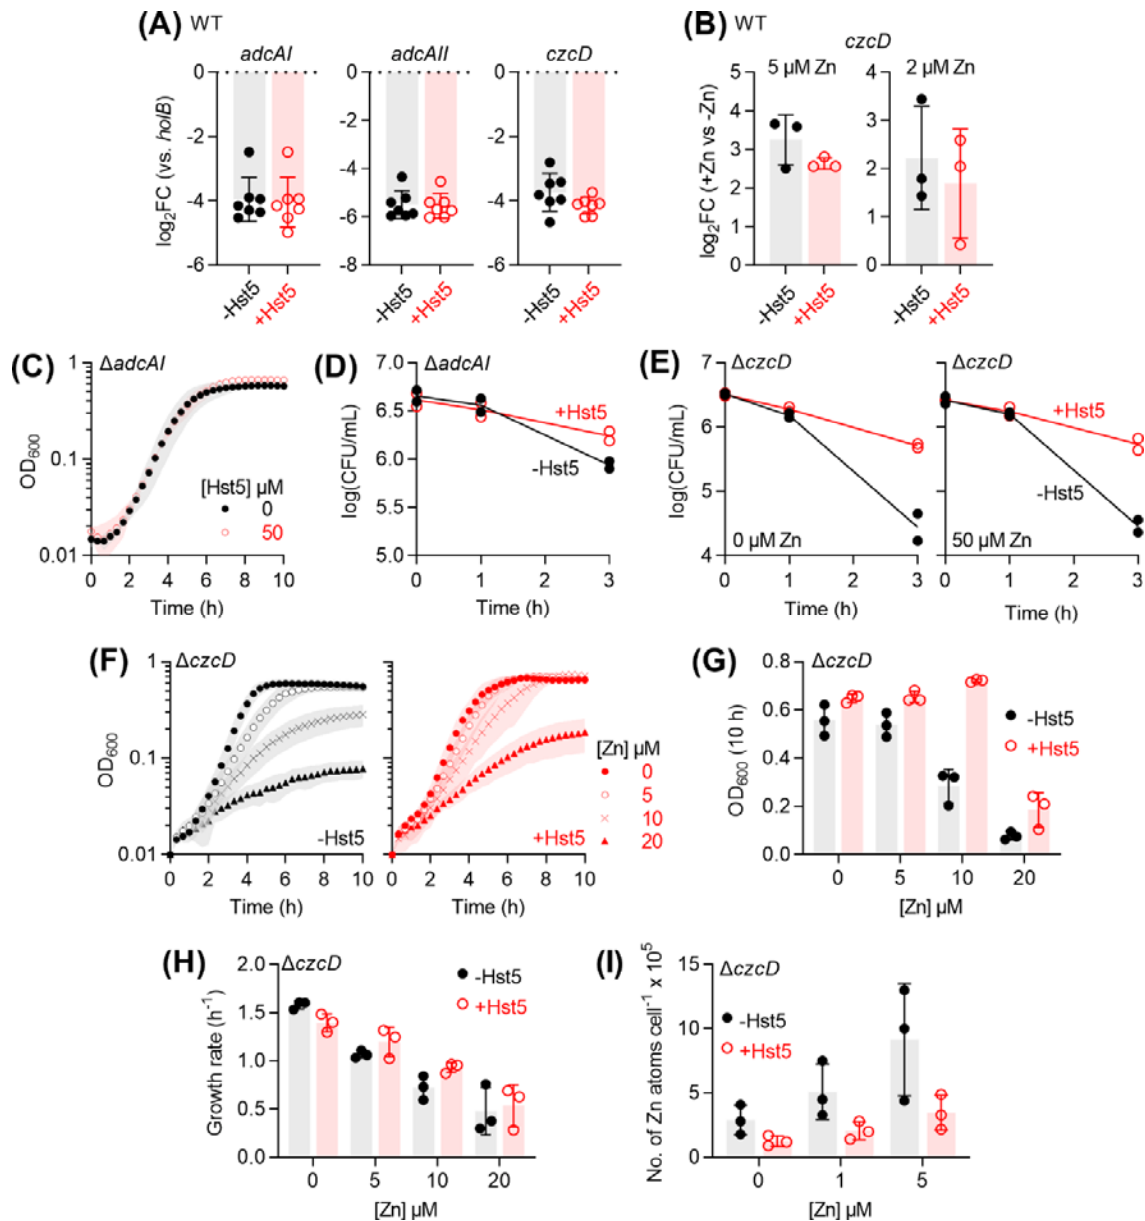

181

182 **Figure 5. Effects of Hst5 on Zn availability. (A) Expression of Zn-responsive genes.** Bacteria ( $N = 7$ ) were cultured in CDM with ( $\circ$ ) or without ( $\bullet$ ) Hst5 (50  $\mu$ M). Levels of *adcA1*, *adcA11*, and *czcD*

183 mRNA were determined by qRT-PCR and normalised to *holB*. **(B) Zn-dependent expression of**

184 ***czcD*.** Bacteria ( $N = 3$ ) were cultured in CDM with or without added Zn (2 or 5  $\mu$ M), with ( $\circ$ ) or without

185 ( $\bullet$ ) Hst5 (50  $\mu$ M). Levels of *czcD* mRNA were measured by qRT-PCR, normalised to *holB*, and

186 compared to normalised mRNA levels of the corresponding untreated controls (0  $\mu$ M added Zn). **(C)**

187 **Growth of  $\Delta$ *adcA1*.** Bacteria ( $N = 3$ ) were cultured in CDM with or without Hst5 (0 or 50  $\mu$ M). **(D)**

188 **Survival of  $\Delta$ *adcA1*.** Bacteria ( $N = 2$ ) were incubated in phosphate buffer with ( $\circ$ ) or without ( $\bullet$ ) Hst5

189 (50  $\mu$ M). **(E) Survival of  $\Delta$ *czcD*.** Bacteria ( $N = 2$ ) were incubated in phosphate buffer with or without

190 added Zn (50  $\mu$ M), with ( $\circ$ ) or without ( $\bullet$ ) Hst5 (50  $\mu$ M). **(F) Growth of  $\Delta$ *czcD*.** Bacteria ( $N = 3$ ) were

191 cultured in CDM in the presence of Zn (0–20  $\mu$ M), with ( $\circ$ ) or without ( $\bullet$ ) Hst5 (50  $\mu$ M). **(G) Final**

192 **culture densities from panel F. (H) Exponential growth rates from panel F. (I) Intracellular Zn**

193



194 **levels in  $\Delta czcD$ .** Bacteria ( $N = 3$ ) were cultured in CDM in the presence of Zn (0–5  $\mu\text{M}$ ), with or  
195 without Hst5 (50  $\mu\text{M}$ ). Intracellular levels of Zn were measured by ICP MS and normalised to colony  
196 counts.

197

198 Two mechanisms are immediately plausible (*cf.* Figure 4): (i) Hst5 binds extracellular Zn and  
199 weakly suppresses entry and accumulation of this metal ion into the cytoplasm, leading to less Zn  
200 toxicity, or (ii) Hst5 binds intracellular Zn and enables more Zn to accumulate in the cytoplasm, but  
201 with less toxicity. To distinguish these models, total intracellular Zn levels in the  $\Delta czcD$  mutant strain  
202 were assessed by ICP MS. Only up to 5  $\mu\text{M}$  Zn was used, since adding 10  $\mu\text{M}$  Zn did not produce  
203 sufficient biomass for metal analyses. Only wild-type Hst5 was used, owing to the large culture  
204 volumes required and the high cost of peptide synthesis.

205 Figure 5I shows that growth in the presence of added Zn increased intracellular Zn levels in  
206 the  $\Delta czcD$  mutant, but co-treatment with Hst5 suppressed this effect. These results initially appeared  
207 to support the first model, in which Hst5 binds extracellular Zn. However, intracellular Cu levels in  
208 these samples were similarly elevated in the absence of Hst5, and similarly suppressed in the  
209 presence of Hst5 (Figure S5C). At this stage, we cannot exclude the possibility that Zn treatment led  
210 to spurious effects associated with the observed growth defect. Thus, while our data hint at a role for  
211 Hst5 in weakly influencing extracellular Zn availability to GAS, they are not conclusive, particularly  
212 when compared with the clear role of Hst5 in strongly influencing Cu availability (described below).

213

#### 214 **Hst5 binds extracellular Cu(II) and strongly limits Cu availability.**

215 Like Zn, adding up to 50  $\mu\text{M}$  of Cu (equimolar with Hst5; *ca.* 10X higher than Cu  
216 concentrations in saliva<sup>41-43</sup>) did not directly affect the growth or survival phenotype of wild-type GAS  
217 in the presence of Hst5 (Figure 6, Figure S1D). However, as in the case with Zn, any effect of Hst5 on  
218 Cu availability may not directly affect wild-type GAS as a result of the transcriptionally-responsive  
219 system for Cu export (Figure 4). This transcriptional response was hereby examined to probe the Cu-  
220 linked action of Hst5.

221

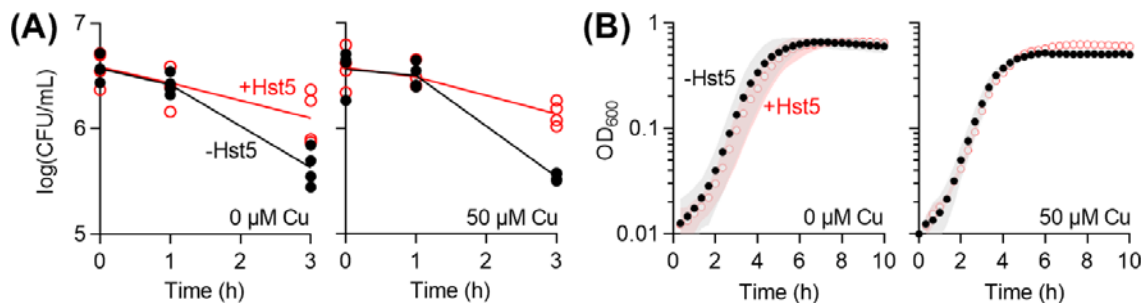

222

223 **Figure 6. Effects of Cu on (A) survival and (B) growth of GAS in the presence of Hst5. (A)**

224 Bacteria ( $N = 5$ ) were incubated in phosphate buffer (A) or cultured in CDM glucose (B), with or  
225 without added Cu (50  $\mu\text{M}$ ), with (○) or without (●) Hst5 (50  $\mu\text{M}$ ).

226

227 The control experiment showed that adding the extracellular Cu chelator BCS did not further  
 228 repress expression of *copA* and *copZ* (Figure S3C), suggesting that GAS grown in CDM was Cu-  
 229 deplete. Adding Cu to the culture medium induced expression of both genes (Figure S3D, Figure 7A),  
 230 consistent with an increase in Cu availability<sup>20</sup>. Intriguingly, co-treatment with Hst5 suppressed  
 231 (instead of enhanced) this Cu-dependent induction (Figure 7A). This effect required the predicted  
 232 Cu(II) binding site<sup>17,44</sup>, since the  $\Delta$ H3 and  $\Delta$ H3,7 variants lacking His3 (Table 1) were less effective at  
 233 reducing expression of *copA* and *copZ* (Figure 7B). By contrast, it did not require the predicted Cu(I)  
 234 binding sites<sup>17</sup>, since the effects of the  $\Delta$ H7,8 and  $\Delta$ H15,18,19 variants lacking either of the *bis*-His  
 235 motifs (Table 1) were indistinguishable to that of the wild-type peptide (Figure 7B).  
 236

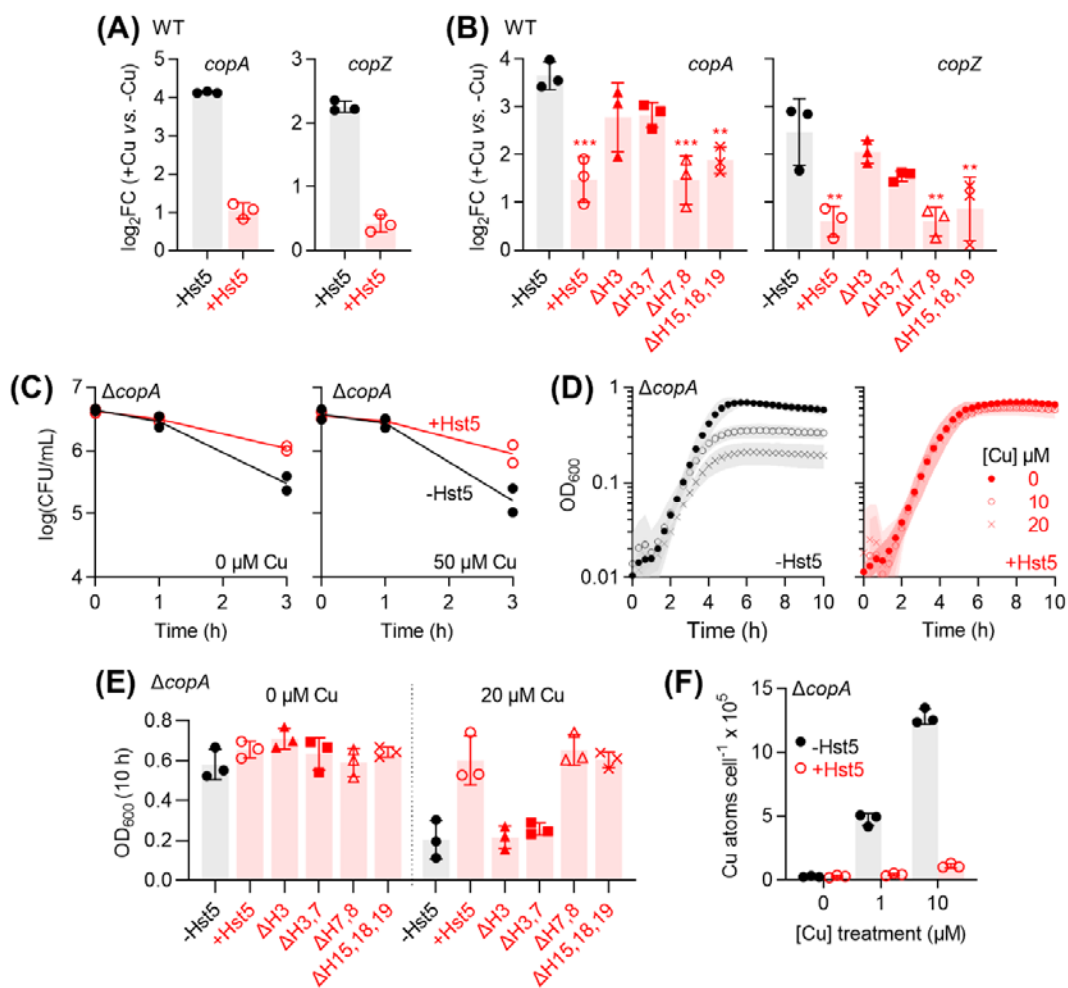

237  
 238 **Figure 7. Effects of Hst5 on Cu availability.** (A) Expression of Cu-inducible genes. Bacteria ( $N =$   
 239 3) were cultured in CDM with or without added Cu (10  $\mu$ M), with or without Hst5 (50  $\mu$ M). Levels of  
 240 *copA* and *copZ* mRNA were measured by qRT-PCR, normalised to *ho1B*, and compared with  
 241 normalised mRNA levels of the corresponding untreated controls (0  $\mu$ M Cu). (B) Effects of Hs5  
 242 variants on expression of Cu-inducible genes. The experiment was performed as described in  
 243 panel A. The following treatments suppressed Cu-dependent *copA* expression when compared with  
 244 untreated control: Hst5 ( $***P = 0.0003$ ),  $\Delta$ H7,8 ( $***P = 0.0003$ ),  $\Delta$ H15,18,19 ( $**P = 0.0018$ ). The

245 following treatments had no effect:  $\Delta H3$  ( $P = 0.1$ ),  $\Delta H3,7$  ( $P = 0.2$ ). The following treatments  
246 suppressed Cu-dependent *copZ* expression when compared with untreated control: Hst5 ( $***P =$   
247  $0.001$ ),  $\Delta H7,8$  ( $***P = 0.001$ ),  $\Delta H15,18,19$  ( $**P = 0.003$ ). The following treatments had no effect:  $\Delta H3$   
248 ( $P = 0.7$ ),  $\Delta H3,7$  ( $P = 0.1$ ). **(C) Survival of  $\Delta copA$ .** Bacteria ( $N = 2$ ) were incubated in phosphate  
249 buffer with or without added Cu ( $50 \mu M$ ), with ( $\circ$ ) or without ( $\bullet$ ) Hst5 ( $50 \mu M$ ). **(D) Growth of  $\Delta copA$ .**  
250 Bacteria ( $N = 3$ ) were cultured in CDM in the presence of added Cu ( $0-20 \mu M$ ), with or without Hst5  
251 ( $50 \mu M$ ). **(E) Effects of Hst5 variants on growth of  $\Delta copA$ .** Bacteria ( $N = 3$ ) were cultured in CDM  
252 with or without added Cu ( $20 \mu M$ ), with or without Hst5 or its variants ( $50 \mu M$ ). Complete growth  
253 curves are shown in Figure S6. For ease of comparison, only  $OD_{600}$  values from the end of the  
254 experiment ( $t = 10$  h) were plotted here. **(F) Intracellular Cu levels in  $\Delta copA$ .** Bacteria ( $N = 3$ ) were  
255 cultured in CDM in the presence of Cu ( $0-10 \mu M$ ), with or without Hst5 ( $50 \mu M$ ). Intracellular levels of  
256 Cu were measured by ICP MS and normalised to colony counts.

257

258 Further examination using a Cu-sensitive  $\Delta copA$  mutant strain that lacks the Cu-effluxing  
259 P-type ATPase<sup>20</sup> (Figure 4) revealed no difference between the survival phenotype of this mutant  
260 strain and that of the wild-type in the presence of Hst5 (Figure 7C). There was, however, a clear  
261 difference in their growth phenotypes. Co-treatment with Hst5 rescued growth of the  $\Delta copA$  mutant  
262 strain in the presence of added Cu (Figure 7D). This protective effect again required the His3 ligand  
263 for Cu(II), but neither of the two *bis*-His ligands for Cu(I) (Figure 7E, Figure S6A). These results  
264 indicate that Hst5 acts as a Cu(II)-specific peptide.

265 Two mechanisms are again plausible (Figure 4): (i) Hst5 binds extracellular Cu and  
266 suppresses entry of Cu into the GAS cytoplasm, leading to less Cu toxicity, or (ii) Hst5 binds  
267 intracellular Cu, allowing intracellular Cu levels to rise without significant toxicity. The latter would  
268 resemble the model described for GSH in binding (buffering) excess intracellular Cu<sup>20</sup>. Since Cu(II) is  
269 not thought to exist within the reducing cytoplasm, the first model is more likely. Consistent with this  
270 proposal, ICP MS analyses of total metal levels in the  $\Delta copA$  mutant confirmed that growth in the  
271 presence of Cu led to an increase in total intracellular Cu levels, but co-treatment with Hst5 strongly  
272 suppressed these levels (Figure 7F). Unlike the situation described earlier for the  $\Delta czcD$  mutant, there  
273 were no unanticipated effects on other metal levels such as Zn (Figure S6B). Thus, it can be  
274 concluded that Hst5 binds extracellular Cu(II) and strongly limits (instead of promotes) Cu availability  
275 to GAS.

276

### 277 **Molecular basis for the action of Hst5 in weakly influencing Zn availability.**

278 Hst5 is thought to bind up to three Zn atoms. ITC measurements yielded  $\log K_{Zn}$  values of 4.0,  
279 5.0, and 5.1<sup>44</sup>. In agreement with Zn binding weakly to Hst5, the Zn-Hst5 complex dissociated upon  
280 passage through a desalting column (Figure 8A).

281 The affinities of Hst5 to Zn were re-examined here by equilibrium competition with the  
282 colorimetric Zn indicator Zincon ( $\log K_{Zn} \sim 6.0$ ) and monitoring solution absorbances of *apo*-Zincon  
283 and Zn-Zincon at 466 nm and 620 nm, respectively (Figure 8B). Unexpectedly, the competition curve  
284 (in the presence of Hst5) was nearly indistinguishable from the control (in the absence of Hst5)

285 (Figure 8C). Moreover, a new peak at 650 nm appeared in the presence of Hst5 (Figure 8B),  
286 indicating formation of a new species, likely a ternary complex between Hst5, Zincon, and Zn. This  
287 peak did not completely disappear upon adding excess Hst5 (Figure 8B). These results indicate that  
288 Hst5 does not compete effectively with Zincon, and that this peptide binds Zn more weakly than  
289 previously estimated by ITC<sup>44</sup>.  
290

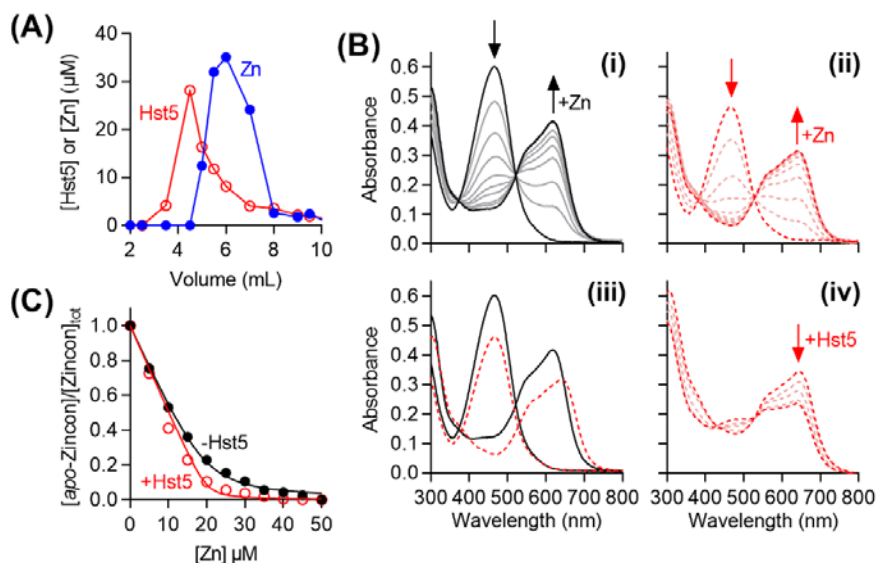

291  
292 **Figure 8. Zn affinity of Hst5.** (A) Representative separation of Hst5 (○) and Zn (●) on a  
293 polyacrylamide desalting column. (B) Representative spectral changes upon addition of Zn (0–50 μM)  
294 into apo-Zincon (20 μM): (i) in the absence (solid traces) or (ii) presence (dashed traces) of Hst5 (20  
295 μM). (iii) Overlaid spectra for 0 and 50 μM Zn from panels (i) and (ii). (iv) Representative spectral  
296 changes upon addition of excess Hst5 (0–200 μM) into a solution of Zn (20 μM) and apo-Zincon (25  
297 μM). (C) Representative normalised plot of the absorbance intensities of apo-Zincon at 467 nm upon  
298 addition of Zn in the absence (●) or presence (○) of Hst5 (20 μM).  
299

300 A previous study showed effective competition between Hst5 and Zincon in phosphate buffer,  
301 with Hst5 removing 2 molar equiv. of Zn from Zincon<sup>15</sup>. However, when used at millimolar  
302 concentrations, phosphate can compete for binding Zn ( $\log K_{Zn} \sim 2.4$ )<sup>45</sup>. Repeating the control titration  
303 in phosphate buffer (50 mM) instead of Mops led to clear partitioning of Zn between Zincon and the  
304 buffer (Figure S7A-B). Prolonged incubation (>10 min) of Zn-Zincon in this buffer led to loss of the  
305 characteristic blue colour (Figure S7C). For these reasons, estimates of Zn affinity and stoichiometry  
306 of Hst5 using Zincon in Mops buffer are likely to be more reliable.

307 The weak binding of extracellular Zn to Hst5 was clearly insufficient to starve wild-type GAS  
308 of nutrient Zn (*cf.* Figures 5A, 5C), indicating that this peptide does not compete with the high-affinity,  
309 Zn-specific uptake protein AdcAI (*cf.* Figure 4). Therefore, the Zn affinities of AdcAI were examined  
310 here by competition with the colorimetric Zn indicator Mag-fura2 (Mf2). The competition curve,  
311 generated by monitoring the solution absorbance of apo-Mf2 at 377 nm, clearly showed two Zn  
312 binding sites in AdcAI (Figure 9A) as anticipated<sup>46</sup>. The tight site outcompeted Mf2, as evidenced by

313 the lack of Representative spectral changes upon adding up to 1 molar equiv. of Zn vs. AdcAI (Figure  
 314 9A). The weak site competed effectively with Mf2 with a  $\log K_{\text{ZN}} = 8.5 (\pm 0.2)$ . The affinity of the tight  
 315 site was better estimated using Quin-2 (Q2) as the competitor. By monitoring absorbance of *apo*-Q2  
 316 at 266 nm, a  $\log K_{\text{ZN}} = 12.5 (\pm 0.2)$  was obtained for this site (Figure 9B).  
 317

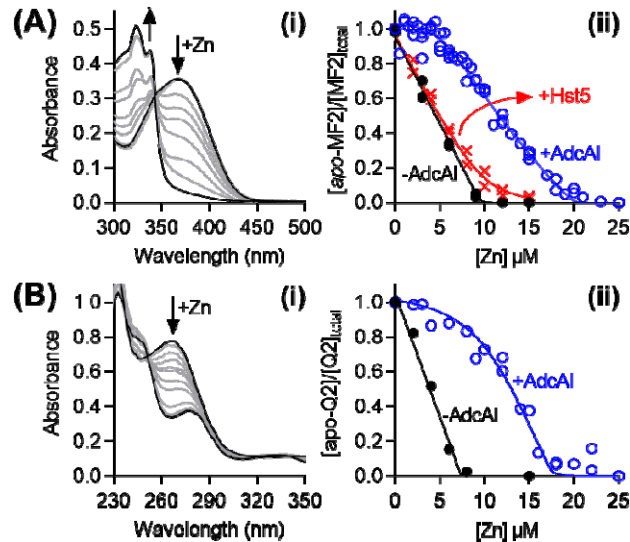

318  
 319 **Figure 9. Zn affinity of AdcAI. (A) Weak site. (i)** Representative spectral changes upon titration of  
 320 Zn (0–25 μM) into a mixture of *apo*-Mf2 (10 μM) and AdcAI (5 μM). **(ii)** Normalised plot of the  
 321 absorbance intensities of *apo*-MF2 (10 μM) at 377 nm upon addition of Zn in the absence (●) or  
 322 presence (○) of AdcAI (5 μM). Competition with Hst5 (□; 10 μM) is shown for comparison. **(B) Tight**  
 323 **site. (i)** Observed Representative spectral changes upon titration of Zn (0–25 μM) into a mixture of  
 324 *apo*-Q2 (7.5 μM) and AdcAI (10 μM). **(ii)** Normalised plot of the absorbance intensities of *apo*-Q2 (7.5  
 325 μM) at 262 nm upon addition of Zn in the absence (●) or presence (○) of AdcAI (10 μM).  
 326

327 The  $\log K_{\text{Zn}}$  values determined here were each ca. 1000-fold tighter than those determined  
 328 previously by ITC<sup>46</sup>. ITC can underestimate metal binding affinities due to lack of sensitivity, lack of  
 329 specificity, and potential side reactions (e.g. competition with buffers)<sup>47</sup>. Crucially, Hst5 did not  
 330 compete with Mf2 for Zn (Figure 9A). These *relative* affinities, determined using the *same* approach  
 331 under the *same* conditions, support the hypothesis that Hst5 does not compete with AdcAI for binding  
 332 Zn, and provide a molecular explanation for why this AMP does not limit the availability of extracellular  
 333 nutrient Zn to wild-type GAS.

334 Hst5 did not affect growth of GAS even when AdcAI was deleted by mutagenesis (cf. Figure  
 335 5D), suggesting that this peptide does not compete with other high-affinity Zn uptake proteins such as  
 336 AdcAll (cf. Figure 4). AdcAll was expressed here for metal competition assays. However, consistent  
 337 with a previous report<sup>48</sup>, it co-purified with 1 molar equiv. of bound Zn, which could not be removed  
 338 without denaturing the protein. Nevertheless, the reported affinity of the *S. pneumoniae* homologue  
 339 ( $\log K_{\text{ZN}} = 7.7$ ; 67% identity, 81% similarity), determined *via* competition with Mf2<sup>49</sup>, is consistent with  
 340 our proposal that Hst5 does not compete effectively with AdcAll for binding Zn.

341 **Molecular basis for the action of Hst5 in strongly influencing Cu availability.**

342 Hst5 binds one Cu(II) ion with  $\log K_{Cu} = 11.1$ , as determined previously by competition with  
 343 NTA<sup>17</sup>. Since both Hst5 and NTA have weak optical signals (Figure S8), this  $\log K_{Cu}$  value was re-  
 344 evaluated here using PAR as an intensely coloured mediator<sup>50</sup> between NTA and Hst5. The control  
 345 titration confirmed that adding Cu(II) decreased the solution absorbance of apo-PAR at 400 nm and  
 346 concomitantly increased that of the Cu(II)-PAR complex<sup>51</sup> at 512 nm (Figure 10A, Figure S9A). PAR  
 347 was then competed with 20 molar equiv. of NTA and, separately, Hst5 (Figures 10B-C). This PAR-  
 348 mediated competition with NTA yielded a  $\log K_{Cu} = 12.1 (\pm 0.1)$  for Hst5 (Figure 10C, Figure S9B-C),  
 349 *i.e.* ~10-fold tighter than estimates from the direct competition with NTA<sup>17</sup>. As previously  
 350 acknowledged, the weak solution absorbances of Cu<sup>II</sup>-NTA and Cu<sup>II</sup>-Hst5 complexes did not saturate  
 351 even in the presence of excess Cu (Figure S8B), indicating potential Cu-buffer interactions that were  
 352 not accounted in the calculations, which may explain the slight underestimate in the literature<sup>17,52</sup>.  
 353

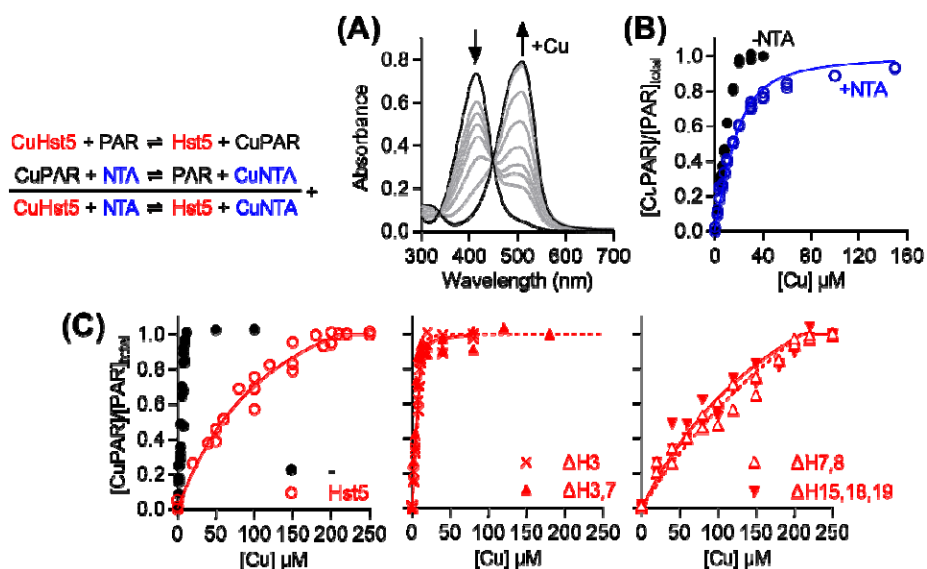

354  
 355 **Figure 10. Cu(II) affinity of Hst5.** (A) Representative spectral changes upon titration of Cu(II) (0–160  
 356  $\mu\text{M}$ ) into apo-PAR (20  $\mu\text{M}$ ). (B) Normalised plot of the absorbance intensities of CuPAR at 512 nm  
 357 upon titration of Cu into apo-PAR (20  $\mu\text{M}$ ) in the absence (●) or presence (○) of NTA (400  $\mu\text{M}$ ). (C)  
 358 Normalised plot of the absorbance intensities of CuPAR at 512 nm upon titration of Cu into apo-PAR  
 359 (10  $\mu\text{M}$ ) in the absence or presence of Hst5 peptides (200  $\mu\text{M}$ ).

360  
 361 Consistent with an earlier report<sup>17</sup>, deletion of either *bis*-His motif did not affect the  
 362 competition between Hst5 and PAR (Figure 10C), confirming that these residues do not participate in  
 363 binding Cu(II). By contrast, deletion of His3 abolished the competition with PAR (Figure 10C),  
 364 confirming the ATCUN motif as Cu(II)-binding ligands. More precise affinities for these variants were  
 365 obtained *via* competition with the fluorometric Cu(II) chelator DP2<sup>53</sup>. By monitoring quenching of apo-  
 366 DP2 fluorescence at 550 nm,  $\log K_{Cu}$  values of 9.3 ( $\pm 1.0$ ) and 9.4 ( $\pm 0.8$ ) were obtained for the  $\Delta\text{H3}$   
 367 and  $\Delta\text{H3,H7}$  variants, respectively (Figure S9D). These values indicate that loss of the ATCUN His  
 368 weakened the affinity of Hst5 to Cu(II) by ~100-fold.

## 369 DISCUSSION

370

### 371 **The role of metal binding in histatin activity: a framework for other metallo-AMPs.**

372 Our work establishes that Hst5 does not contribute to nutritional immunity against GAS, since  
373 this AMP does starve this bacterium of nutrient Zn, nor does it enhance Zn or Cu toxicity. These  
374 findings are consistent with the results from a genome-wide screen of a GAS mutant library, which did  
375 not identify Zn uptake, Zn efflux, or Cu efflux genes as essential for growth in saliva<sup>54</sup>.

376 The low affinity of Hst5 to Zn, particularly when compared with the high affinities of the Zn  
377 uptake lipoproteins AdcAI and AdcAII, explains why Hst5 does not starve GAS of *nutrient* Zn. Here,  
378 the antimicrobial protein calprotectin provides a useful comparison. Calprotectin binds two Zn ions  
379 with affinities ( $\log K_{Zn} > 11$  and  $> 9.6$ )<sup>55</sup> that are comparable to those of AdcAI and tighter than that of  
380 AdcAII. Indeed, adding calprotectin induces a robust Zn starvation response in streptococci<sup>56,57</sup>,  
381 consistent with its established role in nutritional immunity.

382 Its low affinity to Zn also explains why Hst5 only weakly influences availability of excess  
383 (*toxic*) Zn to GAS. Like most culture media, our growth medium<sup>20</sup> contains phosphate (~6 mM) and  
384 amino acids (~6 mM total), which would outcompete Hst5 (50  $\mu$ M) for binding Zn<sup>45</sup>. For these reasons,  
385 synergistic effects between Zn and Hst5, such as those observed *in vitro* against *C. albicans*, may not  
386 result from a direct binding of Zn to Hst5. Instead, the separate biological effects of Zn and Hst5 may  
387 need to be considered. For instance, Zn and Hst5 may act on the same cellular targets or pathways.  
388 Alternatively, growth and survival of cells in the presence of Hst5 may require certain proteins that  
389 become poisoned in the presence of Zn (or *vice versa*).

390 If competing ligands become depleted, for example as a result of bacterial growth, then Hst5  
391 can become competitive and bind Zn, particularly when Zn concentrations are high. Such shifts in Zn  
392 speciation likely explain why the protective effect of Hst5 on the GAS  $\Delta czcD$  mutant during conditions  
393 of Zn stress became apparent only at the later stages of growth (*cf.* Figures 5F-G). The increased  
394 binding of Zn to Hst5 may at this point suppress non-specific Zn import into the GAS cytoplasm, for  
395 instance by outcompeting promiscuous divalent metal transporters or by suppressing direct Zn  
396 diffusion across the lipid bilayer.

397 Saliva contains ~10 mM phosphate<sup>58,59</sup> and proteinaceous components that may also bind  
398 Zn<sup>60</sup>. Unlike *in vitro* growth media, saliva and its components are continuously refreshed *in vivo*.  
399 Therefore, Hst5 is unlikely to strongly influence Zn speciation and availability in saliva. *In vivo*,  
400 synergistic effects between Zn and Hst5 may nonetheless occur, but likely *via* mechanisms that do  
401 not rely on formation of a Zn-Hst5 complex.

402 By contrast to Zn, the high affinity of Hst5 to Cu(II) explains why this AMP strongly influences  
403 Cu availability to GAS (*cf.* Figure 7) and, presumably, other microbes. Hst5 outcompetes background  
404 competing ligands that may also bind Cu, such as phosphate ( $\log K_{Cu} \sim 3.3$ )<sup>61</sup> and amino acids. In  
405 addition, Hst5 likely outcompetes transporters that catalyze *non-specific* Cu(II) uptake into GAS. This  
406 model will need to be tested by directly competing Hst5 and these transporters *in vitro*, but the latter  
407 are yet to be identified and are likely to be diverse.

408 Does Hst5 suppress *nutrient* Cu availability and cause Cu starvation? The GAS genome does

409 not encode Cu-dependent proteins or enzymes, and so this bacterium is not thought to use or uptake  
410 nutrient Cu. Therefore, this proposal will need to be tested using other microbes that do need nutrient  
411 Cu. Nevertheless, parallels can again be drawn with calprotectin, which binds two Cu(II) ions with  
412 affinities ( $\log K_{Cu} = 11.4$  and  $12.7$ )<sup>62</sup> that are comparable to that of Hst5. Treatment with calprotectin  
413 induces a Cu starvation response in *C. albicans*<sup>62</sup>, suggesting that Hst5 may also elicit microbial Cu  
414 starvation response. Yet, Hst5 activity against this fungus appears linked to Cu excess and not Cu  
415 starvation<sup>17</sup>. Thus, the potential role of Hst5 in limiting nutrient Cu awaits further clarification.

416 The approaches described here can help define the role of metal binding in the function of  
417 metallo-AMPs in general. As an illustration, microplusin, a Cu-binding AMP from cattle ticks, is  
418 thought to withhold nutrient Cu from *Cryptococcus neoformans*<sup>63,64</sup>. This proposal was based on the  
419 observation that supplemental Cu suppressed the antimicrobial activity of this AMP. By measuring  
420 expression of Cu-responsive genes and total intracellular Cu levels in *C. neoformans*, one can  
421 determine whether microplusin binds Cu outside or inside target cells, and whether microplusin  
422 indeed influences Cu availability to these cells. By measuring the Cu affinity of microplusin and  
423 comparing it to those of key Cu uptake transporters in *C. neoformans* such as Ctr1, one can further  
424 determine whether microplusin is likely to bind Cu in the relevant host fluid, or whether the synergy  
425 between this AMP and Cu is associated with other unidentified mechanisms.

426

#### 427 **Metal binding by histatins: implications for bacterial colonisation in the oral cavity and** 428 **oropharynx.**

429 GAS causes >600 million worldwide cases of pharyngitis each year<sup>65</sup>, although asymptomatic  
430 carriage in the oropharynx is common, especially among children<sup>66</sup>. This host niche is rich in saliva,  
431 and the interactions between GAS and components of this host fluid are key for colonisation,  
432 infection, and subsequent transmission of this bacterium<sup>67-69</sup>. For example, exposure to saliva  
433 promotes aggregation of GAS and blocks adherence to mucosal epithelia<sup>70</sup>. However, GAS produces  
434 surface adhesins that aid in binding to host mucosal surfaces<sup>71</sup>. Saliva also contains polysaccharides  
435 and glycoproteins that may serve as sources of nutrients. Accordingly, carbohydrate utilisation genes  
436 in GAS are highly expressed upon exposure to saliva<sup>72</sup>, and mutant strains lacking these genes show  
437 decreased fitness in saliva<sup>54</sup>. Given the widely reported antimicrobial activity of Hst5, salivary histatins  
438 are thought to act as antimicrobial peptides. Yet, our work shows that Hst5 does not kill or inhibit  
439 growth of GAS under saliva-relevant conditions.

440 Discussions surrounding histatins have thus far focused on the *antagonistic* relationship  
441 between these AMPs and opportunistic oral pathogens *in vivo*. By comparison, little is known about  
442 the potentially *harmonious* relationship between histatins and microbes that normally colonise healthy  
443 oral and oropharyngeal tissues. We showed here that Hst5 does not kill oral streptococci, which  
444 represent the most abundant microbial taxon in healthy human oral cavity<sup>73-76</sup> and oropharynx<sup>77</sup>. This  
445 lack of an anti-streptococcal effect contrasts with the potent antibacterial effects of Hst5 against  
446 ESKAPE pathogens<sup>11</sup>, although the latter are worth revisiting, to verify that they are not associated  
447 with artificial experimental conditions that do not mimic the saliva.

448 While total levels of intact, full-length Hst5 and major histatins in fresh salivary gland



449 secretions are high (up to 50  $\mu\text{M}$ )<sup>9</sup>, steady-state levels in whole saliva are low<sup>9</sup> as a consequence of  
450 peptide degradation by unidentified salivary proteases and proteases from resident oral microbes<sup>78,79</sup>.  
451 Nearly fifty histatin-derived peptide fragments have been identified<sup>80,81</sup>. Many are associated with  
452 reduced antimicrobial activities<sup>8,80</sup>, raising the question whether an antimicrobial role is the major  
453 physiological role for the histatins.

454 Intriguingly, proteolytic cleavage of histatins in saliva typically leads to retention of the original  
455 Cu(II)-binding ATCUN motif (DSH-) and simultaneous generation of new ATCUN motifs as byproducts  
456 (RHH-, EKH-, KFH-, KRH-, KHH-, HSH-)<sup>80</sup>. These diverse new motifs likely continue to bind Cu(II)<sup>82</sup>,  
457 raising the intriguing possibility that Cu binding is the key physiological role for histatins.

458 We speculate that histatins contribute to oral and oropharyngeal health by buffering Cu  
459 availability. Steady-state levels of Cu in healthy saliva are sub-stoichiometric relative to histatins<sup>41-43</sup>,  
460 but additional Cu does enter the oral cavity through food (e.g. liver, shellfish, dark chocolate). In  
461 addition, Cu levels in saliva can also rise during periodontal diseases<sup>83-85</sup>. By buffering Cu, histatins  
462 may protect resident oral microbes from the potential toxic effects of a sudden or sustained exposure  
463 to excess Cu, and thus promote microbial homeostasis in saliva-rich host niches.

464 Streptococci do not use nutrient Cu, and so these bacteria will only benefit from the action of  
465 histatins as Cu-buffering agents. This idea is not inconsistent with the relative dominance of  
466 *Streptococcus* species in the human oral cavity<sup>74,75</sup> and oropharynx<sup>77</sup>. However, other resident oral  
467 microbes, such as commensal *Neisseria* species and even *C. albicans*, need nutrient Cu for  
468 respiration and energy production. Do histatins buffer *nutrient* Cu availability to these microbes? The  
469 oral cavity and oropharynx are also major entry points for pathogens that can cause oral, gut, and  
470 respiratory infections, many of which also need nutrient Cu. How is Cu availability managed, such that  
471 toxicity is limited to resident microbes but enhanced to foreign, potentially pathogenic microbes, and  
472 that nutrient supply is maintained to resident microbes but suppressed to pathogenic ones? Are there  
473 species-specific differences? What is the molecular basis of such differences? These studies are  
474 ongoing in our laboratory.

475

## 476 **METHODS**

477 **Data presentation.** Except growth curves, individual replicates from microbiological  
478 experiments are plotted, with shaded columns representing the means and error bars representing  
479 standard deviations. Growth curves show the means, with shaded regions representing standard  
480 deviations. The number of biological replicates (independent experiments using different starter  
481 cultures and performed on different days; *N*) is stated in figure legends. Statistical analyses have  
482 been performed on all data but notations of statistical significance are displayed on graphical plots  
483 only if they aid in rapid, visual interpretation. Unless otherwise stated, statistical tests used two-way  
484 analysis of variance using the statistical package in GraphPad Prism 8.0. All analyses were corrected  
485 for multiple comparisons. In the case of metal-protein and metal-peptide titrations, individual data  
486 points from two technical replicates (independent experiments performed on different days but using  
487 the same protein or peptide preparation) are plotted, but only representative spectra are shown for  
488 clarity of presentation.

489           **Reagents.** Sulfate and chloride salts of metals were used interchangeably. Peptides were  
490 synthesised commercially as the acetate salt, purified to >95% (GenScript), and confirmed to be  
491 metal-free by ICP MS. Concentrations of stock peptide solutions were estimated using solution  
492 absorbances at 280 nm in Mops buffer (50 mM, pH 7.4;  $\epsilon_{280} = 2667 \text{ cm}^{-1}$ ). Concentrations of  
493 fluorometric and colourimetric metal indicators (Zincon, PAR, Magfura-2, Quin-2, BCS, DP-2) were  
494 standardised using a commercial standard solution of copper chloride. Concentrations of optically  
495 silent chelators (NTA) were standardised by competition with a standardised solution of Zn-Zincon.

496           **Strains and culture conditions.** Bacterial strains are listed in Dataset S1b. All bacterial  
497 strains (Dataset S1b) were propagated from frozen glycerol stocks onto solid THY (Todd Hewitt +  
498 0.2% yeast extract) medium without any antibiotics. Liquid cultures were prepared in THY or CDM-  
499 glucose<sup>20</sup>. All solid and liquid growth media contained catalase (50  $\mu\text{g/ml}$ ).

500           **Survival assays.** Fresh colonies from an overnight THY agar were resuspended to  $10^6$ - $10^7$   
501 CFU/mL in either potassium phosphate buffer (10 mM, pH 7.4), Mops buffer (10 mM, pH 7.4), or  
502 artificial salivary salts (pH 7.2; Dataset S1a). The cultures were incubated at 37 °C with or without  
503 Hst5 and/or metals as required. At  $t = 0, 1, \text{ and } 3 \text{ h}$ , cultures were sampled and serially diluted in  
504 CDM-glucose. Exactly 10  $\mu\text{L}$  of each serial dilution was spotted onto fresh THY agar. Colonies were  
505 enumerated after overnight incubation at 37 °C.

506           **Growth assays.** Colonies from an overnight THY agar were resuspended in CDM-glucose to  
507 an  $\text{OD}_{600} = 0.01$ . Growth was assessed at 37 °C in flat-bottomed 96-well plates (200  $\mu\text{L}$  per well)  
508 using an automated microplate shaker and reader. Each plate was sealed with a gas permeable,  
509 optically clear membrane (Diversified Biotech).  $\text{OD}_{600}$  values were measured every 20  $\mu\text{min}$  for 10 h.  
510 The plates were shaken immediately before each reading (200  $\mu\text{rpm}$ , 1  $\mu\text{min}$ , double orbital mode).  
511  $\text{OD}_{600}$  values were not corrected for path length (ca. 0.58  $\mu\text{cm}$  for a 200- $\mu\text{L}$  culture).

512           **RNA extraction.** Colonies from an overnight THY agar were resuspended in CDM-glucose to  
513 an  $\text{OD}_{600} = 0.01$  and incubated in 24-well plates (1.6 mL per well) without shaking at 37 °C. Each plate  
514 was sealed with a gas permeable, optically clear membrane (Diversified Biotech). At  $t = 4 \text{ h}$ , cultures  
515 were centrifuged (4,000  $\times g$ , 4°C, 5 min) and bacterial pellets were resuspended immediately in  
516 RNAPro Solution (0.5 mL; MP Biomedicals). Bacteria were lysed in Lysing Matrix B and total RNA  
517 was extracted following manufacturer's protocol (MP Biomedicals). Crude RNA extracts were treated  
518 with RNase-Free DNase I (New England Biolabs). Complete removal of gDNA was confirmed by PCR  
519 using gapA-check-F/R primers (Dataset S1c). gDNA-free RNA was purified using Monarch RNA  
520 Clean-up Kit (New England Biolabs) and visualised on an agarose gel.

521           **qRT-PCR analyses.** cDNA was generated from RNA (1.6  $\mu\text{g}$ ) using SuperScript® IV First-  
522 Strand Synthesis System (Invitrogen). Each qRT-PCR reaction (20  $\mu\text{L}$ ) contained cDNA (5 ng) as  
523 template and the appropriate primer pairs (0.4  $\mu\text{M}$ ; Dataset S1c). Samples were analysed in technical  
524 duplicates. Amplicons were detected with Luna® Universal qRT-PCR Master Mix (New England  
525 Biolabs) in a CFXConnect Real-Time PCR Instrument (Bio-Rad Laboratories).  $C_q$  values were  
526 calculated using LinRegPCR<sup>86</sup> after correcting for amplicon efficiency.  $C_q$  values of technical  
527 duplicates were typically within  $\pm 0.25$  of each other. *hoIB*, which encodes DNA polymerase III, was  
528 used as reference gene. Its transcription levels remained constant in all of the experimental conditions

529 tested here.

530 **Intracellular metal content.** Colonies from an overnight THY agar were resuspended in  
531 CDM-glucose to an  $OD_{600} = 0.02$  and incubated at 37 °C with or without Hst5 and/or metals as  
532 required. At  $t = 4$  h, an aliquot was collected for the measurement of plating efficiency (colony counts).  
533 The remaining cultures were harvested (5,000 g, 4 °C, 10 min), and washed once with ice-cold wash  
534 buffer (1 M *D*-sorbitol, 50 mM Tris-HCl, 10 mM  $MgCl_2$ , 1 mM EDTA, pH 7.4) and twice with ice-cold  
535 PBS. The final pellets were dissolved in concentrated nitric acid (100  $\mu$ L), heated (85 °C, 1.5 h), and  
536 diluted to 3.5 mL with 2 % nitric acid. Total metal levels were determined by ICP MS. The results were  
537 normalised to colony counts.

538 **Elution of Zn-Hst5 on a desalting column.** Apo-Hst5 (100  $\mu$ M) was incubated with 1.5  
539 molar equiv. of Zn for 15 min at the bench and loaded onto a polyacrylamide desalting column (1.8  
540 kDa molecular weight cutoff, Thermo Scientific). Peptide content in each fraction was verified using  
541 QuantiPro BCA Assay Kit (Merck). Zn content was determined using PAR against a standard curve.

542 **Equilibrium competition reactions.** Our approach to determine metal-binding affinities  
543 followed that described by Young and Xiao<sup>47</sup>. For each competition (eq 1 below), a master stock was  
544 prepared to contain both competing ligands (L1 and L2) in Mops buffer (50 mM, pH 7.4). Serial  
545 dilutions of the metal (M) were prepared separately in deionised water. Exactly 135  $\mu$ L of the master  
546 stock was dispensed into an Eppendorf UVette and 15  $\mu$ L of the appropriate metal stock was added.  
547 Solution absorbances were used to calculate concentrations of apo- and metalated forms of the  
548 relevant ligand. These concentrations were plotted against metal concentrations and fitted in  
549 DynaFit<sup>87</sup> using binding models as described in the text. The known association or dissociation  
550 constants for all competitor ligands are listed in Dataset S1d:

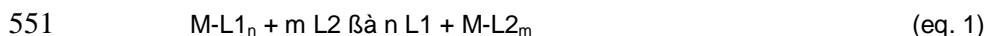

552 **Overexpression and purification of AdcAI and AdcAII.** Nucleic acid sequences encoding  
553 the soluble domains of AdcAI (from Thr21) and AdcAII (from Thr31) from M1GAS strain 5448 were  
554 subcloned into vector pSAT1-LIC using primers listed in Dataset S1c. This vector generates N-  
555 terminal His6-SUMO fusions with the target ORF. The resulting plasmids were propagated in *E. coli*  
556 Dh5 $\alpha$ , confirmed by Sanger sequencing, and transformed into *E. coli* BL21 Rosetta 2(DE3).

557 To express the proteins, transformants were plated onto LB agar. Fresh colonies were used  
558 to inoculate LB (1 L in 2 L baffled flasks) to an  $OD_{600}$  of 0.01. The culture media contained ampicillin  
559 (100  $\mu$ g/mL) and chloramphenicol (33  $\mu$ g/mL) as required. Cultures were shaken (200 rpm, 37 °C)  
560 until an  $OD_{600}$  of 0.6–0.8 was reached, and expression was induced by adding IPTG (0.1 mM). After  
561 shaking for a further 16 h at 20 °C, the cultures were centrifuged (4000  $\times$  g, 4 °C) and the pellets were  
562 resuspended in buffer A500 (20 mM Tris-HCl, pH 7.9, 500 mM NaCl, 5 mM imidazole, 10% glycerol).

563 To purify proteins, bacteria were lysed by sonication (40 kpsi), centrifuged (20,000  $\times$  g, 4°C),  
564 and filtered through a 0.46  $\mu$ m PES membrane filtration unit. Clarified lysates were loaded onto a  
565 HisTrap HP column (Cytiva). The column was washed with 10 column volumes (CV) of buffer A500  
566 followed by 10 CV of buffer A100 (20 mM Tris-HCl, pH 7.9, 100 mM NaCl, 10% w/v glycerol)  
567 containing imidazole (5 mM). Both AdcAI and AdcAII were bound to the column and subsequently  
568 eluted with 3 CV of buffer A100 containing 250 mM imidazole followed by 5 CV of 500 mM imidazole.

569 Protein-containing fractions were loaded onto a Q HP column (Cytiva). The column was washed with  
570 5 CV of buffer A100 and bound proteins were eluted using a step gradient of 0, 10, 15, and 20%  
571 buffer C1000 (20 mM Tris–HCl, pH 7.9, 1000 mM NaCl, 10% w/v glycerol). Eluted proteins were  
572 incubated overnight at 4 °C with hSENP2 SUMO protease to cleave the His6-SUMO tag from the  
573 target protein. Samples were passed through a second Q HP column and the flowthrough fractions  
574 containing untagged target protein were collected.

575

## 576 AUTHOR CONTRIBUTIONS

577 KD conceived the project with input from NJ, SC. JH, KD, LS, NJ designed experiments. NJ  
578 provided oral streptococci strains. IH, SC, YS synthesised peptides for preliminary studies. IH, JH,  
579 KD, LS examined the effects of peptides on bacterial growth. JB, KD measured gene expression by  
580 qRT-PCR. KD, LS measured metal levels by ICP MS. IH, JH, SF measured affinities of peptides to Cu  
581 and Zn. JH produced AdcA and AdcAll proteins, and measured their affinities to Zn. LS examined the  
582 effects of peptides on bacterial survival. JH, KD, LS prepared figures and drafted the manuscript.

583

## 584 ACKNOWLEDGEMENT

585 This work was funded by the Wellcome Trust grant number 214930/Z/18/Z. For the purpose  
586 of open access, the author has applied a CC BY public copyright licence to any Author Accepted  
587 Manuscript version arising from this submission. This project was also supported by a Flexible  
588 Funding Award from the Durham Biophysical Sciences Institute. SF and JB were supported by  
589 studentships from the BBSRC Newcastle-Liverpool-Durham Doctoral Training Partnership.

590 T Blower (Durham University) provided constructs and reagents for production of AdcAI and  
591 AdcAll. GAS  $\Delta adcAI$  and  $\Delta czcD$  mutant strains were from C Ong, A McEwan, and M Walker (The  
592 University of Queensland). Quin2 was from T Young (Durham University). We thank R Borthwick and  
593 P Chivers (Durham University), and Y Ahmed and J Quinn (Newcastle University Biosciences  
594 Institute) for insightful discussions.

595

## 596 REFERENCES

- 597 (1) Zhang, L. J.; Gallo, R. L. Antimicrobial peptides. *Curr Biol* **2016**, *26* (1), R14.  
598 (2) Kim, S. Y.; Zhang, F.; Gong, W.; Chen, K.; Xia, K.; Liu, F.; Gross, R.; Wang, J. M.; Linhardt,  
599 R. J.; Cotten, M. L. Copper regulates the interactions of antimicrobial piscidin peptides from  
600 fish mast cells with formyl peptide receptors and heparin. *J Biol Chem* **2018**, *293* (40), 15381.  
601 (3) Portelinha, J.; Heilemann, K.; Jin, J.; Angeles-Boza, A. M. Unraveling the implications of  
602 multiple histidine residues in the potent antimicrobial peptide Gaduscidin-1. *J Inorg Biochem*  
603 **2021**, *219*, 111391.  
604 (4) Juliano, S. A.; Pierce, S.; deMayo, J. A.; Balunas, M. J.; Angeles-Boza, A. M. Exploration of  
605 the Innate Immune System of *Styela clava*: Zn(2+) Binding Enhances the Antimicrobial  
606 Activity of the Tunicate Peptide Clavanin A. *Biochemistry* **2017**, *56* (10), 1403.  
607 (5) Troxler, R. F.; Offner, G. D.; Xu, T.; Vanderspek, J. C.; Oppenheim, F. G. Structural  
608 relationship between human salivary histatins. *J Dent Res* **1990**, *69* (1), 2.

- 609 (6) Sabatini, L. M.; Azen, E. A. Histatins, a family of salivary histidine-rich proteins, are encoded  
610 by at least two loci (HIS1 and HIS2). *Biochem Biophys Res Commun* **1989**, *160* (2), 495.
- 611 (7) Azen, E. A.; Leutenegger, W.; Peters, E. H. Evolutionary and dietary aspects of salivary basic  
612 (Pb) and post Pb (PPb) proteins in anthropod primates. *Nature* **1978**, *273* (5665), 775.
- 613 (8) Helmerhorst, E. J.; Alagl, A. S.; Siqueira, W. L.; Oppenheim, F. G. Oral fluid proteolytic effects  
614 on histatin 5 structure and function. *Arch Oral Biol* **2006**, *51* (12), 1061.
- 615 (9) Campese, M.; Sun, X.; Bosch, J. A.; Oppenheim, F. G.; Helmerhorst, E. J. Concentration and  
616 fate of histatins and acidic proline-rich proteins in the oral environment. *Arch Oral Biol* **2009**,  
617 *54* (4), 345.
- 618 (10) Puri, S.; Edgerton, M. How does it kill?: understanding the candidacidal mechanism of  
619 salivary histatin 5. *Eukaryot Cell* **2014**, *13* (8), 958.
- 620 (11) Du, H.; Puri, S.; McCall, A.; Norris, H. L.; Russo, T.; Edgerton, M. Human Salivary Protein  
621 Histatin 5 Has Potent Bactericidal Activity against ESKAPE Pathogens. *Front Cell Infect*  
622 *Microbiol* **2017**, *7*, 41.
- 623 (12) Mochon, A. B.; Liu, H. The antimicrobial peptide histatin-5 causes a spatially restricted  
624 disruption on the *Candida albicans* surface, allowing rapid entry of the peptide into the  
625 cytoplasm. *PLoS Pathog* **2008**, *4* (10), e1000190.
- 626 (13) Helmerhorst, E. J.; Breeuwer, P.; van 't Hof, W.; Walgreen-Weterings, E.; Oomen, L. C. J. M.;  
627 Veerman, E. C. I.; Nieuw Amerongen, A. V.; Abee, T. The cellular target of histatin 5 on  
628 *Candida albicans* is the energized mitochondrion. *The Journal of Biological Chemistry* **1999**,  
629 *274* (March 12).
- 630 (14) Helmerhorst, E. J.; van 't Hof, W.; Veerman, E. C. I.; Simoons-Smit, I.; Nieuw Amerongen, A.  
631 V. Synthetic histatin analogues with broad-spectrum antimicrobial activity. *Biochem J* **1997**,  
632 *326*, 39.
- 633 (15) Norris, H. L.; Kumar, R.; Ong, C. Y.; Xu, D.; Edgerton, M. Zinc Binding by Histatin 5 Promotes  
634 Fungicidal Membrane Disruption in *C. albicans* and *C. glabrata*. *J Fungi (Basel)* **2020**, *6* (3).
- 635 (16) Puri, S.; Li, R.; Ruszaj, D.; Tati, S.; Edgerton, M. Iron binding modulates candidacidal  
636 properties of salivary histatin 5. *J Dent Res* **2015**, *94* (1), 201.
- 637 (17) Conklin, S. E.; Bridgman, E. C.; Su, Q.; Riggs-Gelasco, P.; Haas, K. L.; Franz, K. J. Specific  
638 Histidine Residues Confer Histatin Peptides with Copper-Dependent Activity against *Candida*  
639 *albicans*. *Biochemistry* **2017**, *56* (32), 4244.
- 640 (18) Hood, M. I.; Skaar, E. P. Nutritional immunity: transition metals at the pathogen-host interface.  
641 *Nat Rev Microbiol* **2012**, *10* (8), 525.
- 642 (19) Turner, A. G.; Ong, C. Y.; Walker, M. J.; Djoko, K. Y.; McEwan, A. G. Transition Metal  
643 Homeostasis in *Streptococcus pyogenes* and *Streptococcus pneumoniae*. *Adv Microb Physiol*  
644 **2017**, *70*, 123.
- 645 (20) Stewart, L. J.; Ong, C. L.; Zhang, M. M.; Brouwer, S.; McIntyre, L.; Davies, M. R.; Walker, M.  
646 J.; McEwan, A. G.; Waldron, K. J.; Djoko, K. Y. Role of Glutathione in Buffering Excess  
647 Intracellular Copper in *Streptococcus pyogenes*. *mBio* **2020**, *11* (6), e02804.

- 648 (21) Li, X. S.; Sun, J. N.; Okamoto-Shibayama, K.; Edgerton, M. Candida albicans cell wall ssa  
649 proteins bind and facilitate import of salivary histatin 5 required for toxicity. *J Biol Chem* **2006**,  
650 *281* (32), 22453.
- 651 (22) Jang, W. S.; Li, X. S.; Sun, J. N.; Edgerton, M. The P-113 fragment of histatin 5 requires a  
652 specific peptide sequence for intracellular translocation in Candida albicans, which is  
653 independent of cell wall binding. *Antimicrob Agents Chemother* **2008**, *52* (2), 497.
- 654 (23) Yu, H. Y.; Tu, C. H.; Yip, B. S.; Chen, H. L.; Cheng, H. T.; Huang, K. C.; Lo, H. J.; Cheng, J.  
655 W. Easy strategy to increase salt resistance of antimicrobial peptides. *Antimicrob Agents*  
656 *Chemother* **2011**, *55* (10), 4918.
- 657 (24) Han, J.; Jyoti, M. A.; Song, H. Y.; Jang, W. S. Antifungal Activity and Action Mechanism of  
658 Histatin 5-Halocidin Hybrid Peptides against Candida ssp. *PLoS One* **2016**, *11* (2), e0150196.
- 659 (25) Helmerhorst, E. J.; Flora, B.; Troxler, R. F.; Oppenheim, F. G. Dialysis unmasks the fungicidal  
660 properties of glandular salivary secretions. *Infect Immun* **2004**, *72* (5), 2703.
- 661 (26) Meurer, M.; O'Neil, D. A.; Lovie, E.; Simpson, L.; Torres, M. D. T.; de la Fuente-Nunez, C.;  
662 Angeles-Boza, A. M.; Kleinsorgen, C.; Mercer, D. K.; von Kockritz-Blickwede, M. Antimicrobial  
663 Susceptibility Testing of Antimicrobial Peptides Requires New and Standardized Testing  
664 Structures. *ACS Infect Dis* **2021**, *7* (8), 2205.
- 665 (27) Fernandez-Presas, A. M.; Marquez Torres, Y.; Garcia Gonzalez, R.; Reyes Torres, A.; Becker  
666 Fauser, I.; Rodriguez Barrera, H.; Ruiz Garcia, B.; Toloza Medina, R.; Delgado Dominguez,  
667 J.; Molinari Soriano, J. L. Ultrastructural damage in Streptococcus mutans incubated with  
668 saliva and histatin 5. *Arch Oral Biol* **2018**, *87*, 226.
- 669 (28) MacKay, B. J.; Denepitiya, L.; Iacono, V. J.; Krost, S. B.; Pollock, J. J. Growth-inhibitory and  
670 bactericidal effects of human parotid salivary histidine-rich polypeptides on *Streptococcus*  
671 *mutans*. *Infect Immun* **1984**, *44*, 695.
- 672 (29) Tian, X. L.; Salim, H.; Dong, G.; Parcels, M.; Li, Y. H. The BceABRS four-component system  
673 that is essential for cell envelope stress response is involved in sensing and response to host  
674 defence peptides and is required for the biofilm formation and fitness of Streptococcus  
675 mutans. *J Med Microbiol* **2018**, *67* (6), 874.
- 676 (30) Andrian, E.; Qi, G.; Wang, J.; Halperin, S. A.; Lee, S. F. Role of surface proteins SspA and  
677 SspB of Streptococcus gordonii in innate immunity. *Microbiology (Reading)* **2012**, *158* (Pt 8),  
678 2099.
- 679 (31) Krzyściak, W.; Jurczak, A.; Piątkowski, J.; Kościelniak, D.; Gregorczyk-Maga, I.; Kołodziej, I.;  
680 Papież, M. A.; Olczak-Kowalczyk, D. Effect of histatin-5 and lysozyme on the ability of  
681 Streptococcus mutans to form biofilms in *in vitro* conditions. *Postepy Hig Med Dosw (online)*  
682 **2015**, *69*, 1056.
- 683 (32) Helmerhorst, E. J.; Hodgson, R.; van 't Hof, W.; Veerman, E. C. I.; Nieuw Amerongen, A. V.  
684 The Effects of Histatin-derived Basic Antimicrobial Peptides on Oral Biofilms. *J Dent Res*  
685 **1999**, *78* (6), 1245.
- 686 (33) Greger, J. L.; Sickles, V. S. Saliva zinc levels: potential indicators of zinc status. *The*  
687 *American Journal of Clinical Nutrition* **1979**, *32*, 1859.

- 688 (34) Sanson, M.; Makthal, N.; Flores, A. R.; Olsen, R. J.; Musser, J. M.; Kumaraswami, M.  
689 Adhesin competence repressor (AdcR) from *Streptococcus pyogenes* controls adaptive  
690 responses to zinc limitation and contributes to virulence. *Nucleic Acids Res* **2015**, *43* (1), 418.
- 691 (35) Ong, C. L.; Gillen, C. M.; Barnett, T. C.; Walker, M. J.; McEwan, A. G. An antimicrobial role for  
692 zinc in innate immune defense against group A streptococcus. *J Infect Dis* **2014**, *209* (10),  
693 1500.
- 694 (36) Young, C. A.; Gordon, L. D.; Fang, Z.; Holder, R. C.; Reid, S. D. Copper Tolerance and  
695 Characterization of a Copper-Responsive Operon, copYAZ, in an M1T1 Clinical Strain of  
696 *Streptococcus pyogenes*. *J Bacteriol* **2015**, *197* (15), 2580.
- 697 (37) Tedde, V.; Rosini, R.; Galeotti, C. L. Zn<sup>2+</sup> Uptake in *Streptococcus pyogenes*:  
698 Characterization of adcA and lmb Null Mutants. *PLoS One* **2016**, *11* (3), e0152835.
- 699 (38) Ong, C. L.; Berking, O.; Walker, M. J.; McEwan, A. G. New Insights into the Role of Zinc  
700 Acquisition and Zinc Tolerance in Group A Streptococcal Infection. *Infect Immun* **2018**, *86* (6),  
701 e00048.
- 702 (39) Grogan, J.; McKnight, C. J.; Troxler, R. F.; Oppenheim, F. G. Zinc and copper bind to unique  
703 sites of histatin 5. *FEBS J* **2001**, *491*, 76.
- 704 (40) Melino, S.; Stefano Rufini, S.; Sette, M.; Morero, R.; Grottesi, A.; Paci, M.; Petruzzelli, R.  
705 Zn<sup>2+</sup> ions Selectively Induce Antimicrobial Salivary Peptide Histatin-5 To Fuse Negatively  
706 Charged Vesicles. Identification and Characterization of a Zinc-Binding Motif Present in the  
707 Functional Domain. *Biochemistry* **1999**, *38*, 9626.
- 708 (41) Shetty, S. R.; Babu, S.; Kumari, S.; Shetty, P.; Hegde, S.; Karikal, A. Status of trace elements  
709 in saliva of oral precancer and oral cancer patients. *J Cancer Res Ther* **2015**, *11* (1), 146.
- 710 (42) Duggal, M. S.; Chawla, H. S.; Curzon, M. E. J. A study of the relationship between trace  
711 elements in saliva and dental caries in children. *Archives of Oral Biology* **1991**, *36* (12), 881.
- 712 (43) Inonu, E.; Hakki, S. S.; Kayis, S. A.; Nielsen, F. H. The Association Between Some Macro  
713 and Trace Elements in Saliva and Periodontal Status. *Biol Trace Elem Res* **2020**, *197* (1), 35.
- 714 (44) Gusman, H.; Lendenmann, U.; Grogan, J.; Troxler, R. F.; Oppenheim, F. G. Is salivary  
715 histatin 5 a metalloprotein? *Biochimica et Biophysica Acta* **2001**, *1545*, 86.
- 716 (45) Krezel, A.; Maret, W. The biological inorganic chemistry of zinc ions. *Arch Biochem Biophys*  
717 **2016**, *611*, 3.
- 718 (46) Cao, K.; Li, N.; Wang, H.; Cao, X.; He, J.; Zhang, B.; He, Q. Y.; Zhang, G.; Sun, X. Two zinc-  
719 binding domains in the transporter AdcA from *Streptococcus pyogenes* facilitate high-affinity  
720 binding and fast transport of zinc. *J Biol Chem* **2018**, *293* (16), 6075.
- 721 (47) Young, T. R.; Xiao, Z. Principles and practice of determining metal-protein affinities. *Biochem*  
722 *J* **2021**, *478* (5), 1085.
- 723 (48) Linke, C.; Caradoc-Davies, T. T.; Young, P. G.; Proft, T.; Baker, E. N. The laminin-binding  
724 protein Lbp from *Streptococcus pyogenes* is a zinc receptor. *J Bacteriol* **2009**, *191* (18), 5814.
- 725 (49) Zupan, M. L.; Luo, Z.; Ganio, K.; Pederick, V. G.; Neville, S. L.; Deplazes, E.; Kobe, B.;  
726 McDevitt, C. A. Conformation of the Solute-Binding Protein AdcAll Influences Zinc Uptake in  
727 *Streptococcus pneumoniae*. *Front Cell Infect Microbiol* **2021**, *11*, 729981.

- 728 (50) Zimmermann, M.; Xiao, Z.; Cobbett, C. S.; Wedd, A. G. Metal specificities of Arabidopsis zinc  
729 and copper transport proteins match the relative, but not the absolute, affinities of their N-  
730 terminal domains. *Chem Commun (Camb)* **2009**, DOI:10.1039/b916472c  
731 10.1039/b916472c(42), 6364.
- 732 (51) Doyle, C. M.; Naser, D.; Bauman, H. A.; Rumfeldt, J. A. O.; Meiering, E. M.  
733 Spectrophotometric method for simultaneous measurement of zinc and copper in  
734 metalloproteins using 4-(2-pyridylazo)resorcinol. *Anal Biochem* **2019**, *579*, 44.
- 735 (52) Rozga, M.; Sokolowska, M.; Protas, A. M.; Bal, W. Human serum albumin coordinates Cu(II)  
736 at its N-terminal binding site with 1 pM affinity. *J Biol Inorg Chem* **2007**, *12* (6), 913.
- 737 (53) Young, T. R.; Wijekoon, C. J.; Spyrou, B.; Donnelly, P. S.; Wedd, A. G.; Xiao, Z. A set of  
738 robust fluorescent peptide probes for quantification of Cu(ii) binding affinities in the  
739 micromolar to femtomolar range. *Metallomics* **2015**, *7* (3), 567.
- 740 (54) Zhu, L.; Charbonneau, A. R. L.; Waller, A. S.; Olsen, R. J.; Beres, S. B.; Musser, J. M. Novel  
741 Genes Required for the Fitness of *Streptococcus pyogenes* in Human Saliva. *mSphere* **2017**,  
742 *2* (6), e00460.
- 743 (55) Brophy, M. B.; Hayden, J. A.; Nolan, E. M. Calcium ion gradients modulate the zinc affinity  
744 and antibacterial activity of human calprotectin. *J Am Chem Soc* **2012**, *134* (43), 18089.
- 745 (56) Makthal, N.; Nguyen, K.; Do, H.; Gavagan, M.; Chandrangsou, P.; Helmann, J. D.; Olsen, R. J.;  
746 Kumaraswami, M. A Critical Role of Zinc Importer AdcABC in Group A *Streptococcus*-Host  
747 Interactions During Infection and Its Implications for Vaccine Development. *EBioMedicine*  
748 **2017**, *21*, 131.
- 749 (57) Burcham, L. R.; Le Breton, Y.; Radin, J. N.; Spencer, B. L.; Deng, L.; Hiron, A.; Ransom, M.  
750 R.; Mendonca, J. D. C.; Belew, A. T.; El-Sayed, N. M. et al. Identification of Zinc-Dependent  
751 Mechanisms Used by Group B *Streptococcus* To Overcome Calprotectin-Mediated Stress.  
752 *mBio* **2020**, *11* (6).
- 753 (58) Hartman, M. L.; Groppo, F.; Ohnishi, M.; Goodson, J. M.; Hasturk, H.; Tavares, M.; Yaskell,  
754 T.; Floros, C.; Behbehani, K.; Razzaque, M. S. Can salivary phosphate levels be an early  
755 biomarker to monitor the evolvement of obesity? *Contrib Nephrol* **2013**, *180*, 138.
- 756 (59) Savica, V.; Calo, L. A.; Caldarera, R.; Cavaleri, A.; Granata, A.; Santoro, D.; Savica, R.;  
757 Muraca, U.; Mallamace, A.; Bellinghieri, G. Phosphate salivary secretion in hemodialysis  
758 patients: implications for the treatment of hyperphosphatemia. *Nephron Physiol* **2007**, *105* (3),  
759 p52.
- 760 (60) Lynge Pedersen, A. M.; Belstrom, D. The role of natural salivary defences in maintaining a  
761 healthy oral microbiota. *J Dent* **2019**, *80 Suppl 1*, S3.
- 762 (61) Powell, K. J.; Brown, P. L.; Byrne, R. H.; Gajda, T.; Hefter, G.; Sjoberg, S.; Wanner, H.  
763 Chemical speciation of environmentally significant metals with inorganic ligands - Part 2: The  
764 Cu<sup>2+</sup>-OH<sup>-</sup>, Cl<sup>-</sup>, CO<sub>3</sub><sup>2-</sup>, SO<sub>4</sub><sup>2-</sup>, and PO<sub>4</sub><sup>3-</sup> systems - (IUPAC technical report). *Pure Appl*  
765 *Chem* **2007**, *79* (5), 895.



- 766 (62) Besold, A. N.; Gilston, B. A.; Radin, J. N.; Ramsoomair, C.; Culbertson, E. M.; Li, C. X.;  
767 Cormack, B. P.; Chazin, W. J.; Kehl-Fie, T. E.; Culotta, V. C. Role of Calprotectin in  
768 Withholding Zinc and Copper from *Candida albicans*. *Infect Immun* **2018**, *86* (2).
- 769 (63) Silva, F. D.; Rezende, C. A.; Rossi, D. C.; Esteves, E.; Dyszy, F. H.; Schreier, S.; Gueiros-  
770 Filho, F.; Campos, C. B.; Pires, J. R.; Daffre, S. Structure and mode of action of microplusin,  
771 a copper II-chelating antimicrobial peptide from the cattle tick *Rhipicephalus (Boophilus)*  
772 *microplus*. *J Biol Chem* **2009**, *284* (50), 34735.
- 773 (64) Silva, F. D.; Rossi, D. C.; Martinez, L. R.; Frases, S.; Fonseca, F. L.; Campos, C. B.;  
774 Rodrigues, M. L.; Nosanchuk, J. D.; Daffre, S. Effects of microplusin, a copper-chelating  
775 antimicrobial peptide, against *Cryptococcus neoformans*. *FEMS Microbiol Lett* **2011**, *324* (1),  
776 64.
- 777 (65) Carapetis, J. R.; Steer, A. C.; Mulholland, E. K.; Weber, M. The global burden of group A  
778 streptococcal diseases. *Lancet Infect Dis* **2005**, *5* (11), 685.
- 779 (66) Shaikh, N.; Leonard, E.; Martin, J. M. Prevalence of streptococcal pharyngitis and  
780 streptococcal carriage in children: a meta-analysis. *Pediatrics* **2010**, *126* (3), e557.
- 781 (67) Hamburger, M.; Robertson, O. H. Expulsion of group a hemolytic streptococci in droplets and  
782 droplet nuclei by sneezing, coughing and talking. *The American Journal of Medicine* **1948**, *4*  
783 (5), 690.
- 784 (68) Hamburger Jr, M. Studies on the transmission of hemolytic streptococcus infections: II. Beta  
785 hemolytic streptococci in the saliva of persons with positive throat cultures. *The Journal of*  
786 *Infectious Diseases* **1944**, 71.
- 787 (69) Courtney, H. S.; Hasty, D. L. Aggregation of group A streptococci by human saliva and effect  
788 of saliva on streptococcal adherence to host cells. *Infect Immun* **1991**, *59* (5), 1661.
- 789 (70) Courtney, H.; Hasty, D. Aggregation of group A streptococci by human saliva and effect of  
790 saliva on streptococcal adherence to host cells. *Infection and immunity* **1991**, *59* (5), 1661.
- 791 (71) Brouwer, S.; Barnett, T. C.; Rivera-Hernandez, T.; Rohde, M.; Walker, M. J. Streptococcus  
792 pyogenes adhesion and colonization. *FEBS Letters* **2016**, *590* (21), 3739.
- 793 (72) Shelburne, S. A., 3rd; Sumby, P.; Sitkiewicz, I.; Granville, C.; DeLeo, F. R.; Musser, J. M.  
794 Central role of a bacterial two-component gene regulatory system of previously unknown  
795 function in pathogen persistence in human saliva. *Proc Natl Acad Sci U S A* **2005**, *102* (44),  
796 16037.
- 797 (73) Bik, E. M.; Long, C. D.; Armitage, G. C.; Loomer, P.; Emerson, J.; Mongodin, E. F.; Nelson, K.  
798 E.; Gill, S. R.; Fraser-Liggett, C. M.; Relman, D. A. Bacterial diversity in the oral cavity of 10  
799 healthy individuals. *ISME J* **2010**, *4* (8), 962.
- 800 (74) Zaura, E.; Keijsers, B. J.; Huse, S. M.; Crielaard, W. Defining the healthy "core microbiome" of  
801 oral microbial communities. *BMC Microbiol* **2009**, *9*, 259.
- 802 (75) Dewhirst, F. E.; Chen, T.; Izard, J.; Paster, B. J.; Tanner, A. C.; Yu, W. H.; Lakshmanan, A.;  
803 Wade, W. G. The human oral microbiome. *J Bacteriol* **2010**, *192* (19), 5002.
- 804 (76) Aas, J. A.; Paster, B. J.; Stokes, L. N.; Olsen, I.; Dewhirst, F. E. Defining the normal bacterial  
805 flora of the oral cavity. *J Clin Microbiol* **2005**, *43* (11), 5721.

- 806 (77) Bach, L. L.; Ram, A.; Ijaz, U. Z.; Evans, T. J.; Lindström, J. A Longitudinal Study of the  
807 Human Oropharynx Microbiota Over Time Reveals a Common Core and Significant  
808 Variations With Self-Reported Disease. *Frontiers in Microbiology* **2021**, *11* (3545).
- 809 (78) Bochenska, O.; Rapala-Kozik, M.; Wolak, N.; Aoki, W.; Ueda, M.; Kozik, A. The action of ten  
810 secreted aspartic proteases of pathogenic yeast *Candida albicans* on major human salivary  
811 antimicrobial peptide, histatin 5. *Acta Biochim Pol* **2016**, *63* (3), 403.
- 812 (79) Ikononova, S. P.; Moghaddam-Taaheri, P.; Wang, Y.; Doolin, M. T.; Stroka, K. M.; Hube, B.;  
813 Karlsson, A. J. Effects of histatin 5 modifications on antifungal activity and kinetics of  
814 proteolysis. *Protein Sci* **2020**, *29* (2), 480.
- 815 (80) Hardt, M.; Thomas, L. R.; Dixon, S. E.; Newport, G.; Agabian, N.; Prakobphol, A.; Hall, S. C.;  
816 Witkowska, H. E.; Susan J. Fisher, S. J. Toward Defining the Human Parotid Gland Salivary  
817 Proteome and Peptidome. *Biochemistry* **2005**, *44* (8), 2885.
- 818 (81) Vitorino, R.; Barros, A.; Caseiro, A.; Domingues, P.; Duarte, J.; Amado, F. Towards defining  
819 the whole salivary peptidome. *PROTEOMICS - Clinical Applications* **2009**, *3* (5), 528.
- 820 (82) Gonzalez, P.; Bossak, K.; Stefaniak, E.; Hureau, C.; Raibaut, L.; Bal, W.; Faller, P. N-  
821 Terminal Cu-Binding Motifs (Xxx-Zzz-His, Xxx-His) and Their Derivatives: Chemistry, Biology  
822 and Medicinal Applications. *Chemistry* **2018**, *24* (32), 8029.
- 823 (83) Herman, M.; Golasik, M.; Piekoszewski, W.; Walas, S.; Napierala, M.; Wyganowska-  
824 Swiatkowska, M.; Kurhanska-Flisykowska, A.; Wozniak, A.; Florek, E. Essential and Toxic  
825 Metals in Oral Fluid-a Potential Role in the Diagnosis of Periodontal Diseases. *Biol Trace*  
826 *Elem Res* **2016**, *173* (2), 275.
- 827 (84) Manea, A.; Nechifor, M. Research on Plasma and Saliva Levels of Some Bivalent Cations in  
828 Patients with Chronic Periodontitis (Salivary Cations in Chronic Periodontitis) *Rev. Med. Chir.*  
829 *Soc. Med. Nat., Iași* **2014**, *118* (2), 439.
- 830 (85) Romano, F.; Castiblanco, A.; Spadotto, F.; Di Scipio, F.; Malandrino, M.; Berta, G. N.; Aimetti,  
831 M. ICP-Mass-Spectrometry Ionic Profile of Whole Saliva in Patients with Untreated and  
832 Treated Periodontitis. *Biomedicines* **2020**, *8* (9).
- 833 (86) Ramakers, C.; Ruijter, J. M.; Deprez, R. H.; Moorman, A. F. Assumption-free analysis of  
834 quantitative real-time polymerase chain reaction (PCR) data. *Neurosci Lett* **2003**, *339* (1), 62.
- 835 (87) Kuzmic, P. DynaFit--a software package for enzymology. *Methods Enzymol* **2009**, *467*, 247.
- 836
